# Supplementary material for: Developmental emergence of two-stage nonlinear synaptic integration in cerebellar interneurons
Source: eLife. 2021 Nov 3;10:e65954. doi: 10.7554/eLife.65954 (PMC8565927; doi:10.7554/eLife.65954)
Supplement: Figure 1—source data 1. [file elife-65954-fig1-data1.xlsx]

## Sheet: Panel B
Figure 1 - figure supplement 1 The amplitude of direct EPSCs and outward currents are not correlated.
	Figure 1 - figure supplement 1B
	BL		10V		20V		30V		40V
	Inward current peak (pA)	Outward current peak (pA)	Inward current peak (pA)	Outward current peak (pA)	Inward current peak (pA)	Outward current peak (pA)	Inward current peak (pA)	Outward current peak (pA)	Inward current peak (pA)	Outward current peak (pA)
	0.127773	-1.31651	-0.426045	-1.12938	-119.358	-0.9238	-604.816	1.9163	-616.603	4.2581
	-1.85685	1.22785	-2.52516	1.6798	-303.352	-0.0519	-522.994	11.1607	-520.2	9.4538
	0.885449	0.895931	-1.15314	-1.72568	-81.1872	0.87439	-436.828	-4.3724	-505.606	11.3819
	-0.684675	1.02338	2.39118	2.65192	2.29389	5.10106	-528.4	8.8622	-576.669	7.6354
	0.294614	0.2454	-3.54893	-0.619777	-77.2073	0.265826	-508.774	9.1993	-491.453	7.4787
	-1.65966	0.018	-4.01409	-0.444504	-167.979	-4.57511	-363.069	-3.9201	-580.828	11.716
	-1.47768	1.16872	-76.385	-2.56364	-321.422	2.02566	-403.443	8.0833	-518.893	8.3055
	2.85556	1.11454	-3.60573	3.81456	-254.494	1.12857	-502.415	7.9323	-468.73	10.8292
	1.89638	0.87137	-81.1584	-0.96921	-259.258	1.15627	-607.566	10.4916	-514.434	2.2904
	-0.476694	1.01051	-0.91874	2.31322	-290.492	-2.78894	-301.595	-4.9717	-581.449	7.7153
	-0.945307	0.813	-1.86087	3.61	-98.5293	12.5565	-414.759	7.1937	-548.37	9.2436
	-0.159593	-0.784619	-6.95262	0.614897	-168.316	0.123	-400.598	10.166	-499.494	6.9662
	0.456654	-1.09504	-2.01615	-1.2572	-146.492	-5.12873	-403.081	10.7585	-667.756	6.7416
	1.93945	-0.306785	-4.35737	1.49197	-103.503	0.0661	-352.68	12.9321	-496.086	6.9635
	0.174779	-0.92228	-1.27545	0.476096	-178.736	-8.15597	-493.84	5.6976	-571.893	10.2371
	0.89705	-2.55538	-2.88998	-1.51509	-163.827	-6.19626	-571.914	5.7895	-475.482	10.981
	-0.197518	-1.07792	1.16286	-1.30682	-174.244	-1.87	-420.167	12.4307	-592.714	12.5625
	-0.775638	-0.853347	0.0621	-0.0386	-138.1	1.502	-405.199	9.7452	-672.234	8.5887
	-1.42277	0.117	0.195886	1.9	-145.604	2.23384	-457.815	11.6485	-495.737	10.4229
	Summary Statistics
	BL		10V		20V		30V		40V
	Inward current peak (pA)	Outward current peak (pA)	Inward current peak (pA)	Outward current peak (pA)	Inward current peak (pA)	Outward current peak (pA)	Inward current peak (pA)	Outward current peak (pA)	Inward current peak (pA)	Outward current peak (pA)
N traces	19		19		19		19		19
Mean	-0.00677242	-0.0213949	-9.96188	0.367506	-167.885	-0.139875	-457.89	6.881	-547.09	8.62
SD	1.29331	1.08999	24.3564	1.89419	85.2557	4.48707	85.735	5.669	61.064	2.598
	Statistical Test Performed
	Linear least squares regression analysis
		20V		30V		40V
	Equation	Y = 0,01294*X + 0,002033		Y = -0,01409*X + 0,0004309		Y = 0,005934*X + 0,01187
	Is slope significantly non-zero? - F test
	F	1.094		0.8082		0.3373
	DFn, DFd	1, 17		1, 17		1, 17
	P value	0.3102		0.3812		0.569

## Sheet: Panel 1A
Figure 1A
		mEPSC Immature SC			mEPSC Adult SC
		amp (pA)	rise time (ms)		amp (pA)	rise time (ms)
		-47.5496	0.258415		-45.8292	0.29987
		-84.6132	0.174614		-23.6876	0.9952
		-32.5207	0.265709		-24.5928	0.65211
		-21.5459	0.187394		-35.6434	0.20745
		-27.5193	0.389463		-22.1946	0.52699
		-33.5589	0.166735		-18.686	0.49787
		-48.3412	0.176144		-24.7079	0.45037
		-56.8656	0.203986		-18.5871	0.77446
		-24.1432	0.31687		-35.3251	0.53611
		-34.6914	0.284753		-24.3967	0.2453
		-27.7456	0.219551		-19.637	0.58295
		-42.1969	0.127175		-25.4769	0.33561
		-21.9684	0.184889		-19.5391	0.29779
		-42.1118	0.130177		-31.301	0.25184
		-29.2971	0.171812		-35.2816	0.50852
		-33.8489	0.228704		-22.6362	0.70033
		-58.3493	0.151215		-20.5892	0.45514
		-37.6434	0.151239		-26.1337	0.68982
		-71.0048	0.235472		-23.9692	0.61444
		-41.0399	0.0913162		-15.295	0.25609
		-37.0797	0.176466		-37.7745	0.58342
		-90.8655	0.222051		-37.5709	0.43377
		-35.7195	0.166098		-28.0275	0.28266
		-28.156	0.108439		-22.1885	0.23411
		-22.039	0.11693		-17.9576	0.32014
		-66.9978	0.119373		-20.2626	0.37213
		-11.669	0.0575438		-21.9413	0.54
		-15.6515	0.127229		-40.4583	0.28796
		-14.6618	0.0735264		-19.5518	1.24353
		-104.227	0.153917		-30.066	0.39515
		-15.5959	0.171096		-20.8318	0.47
		-11.9341	0.15302		-22.2075	0.83867
		-15.3293	0.181359		-20.6134	0.20616
		-43.5933	0.139741		-19.7635	0.62206
		-28.2366	0.191358		-30.888	0.86267
		-41.148	0.201998		-49.5089	0.40435
		-107.946	0.160967		-27.8423	0.10413
		-66.6902	0.139018		-34.7463	0.19289
		-34.832	0.177351		-18.9938	0.59906
		-27.3784	0.176445		-25.7913	0.38163
		-23.3287	0.177905		-16.7449	0.76582
		-78.2946	0.129879		-15.227	0.20372
		-59.6182	0.120822		-55.3817	0.33393
		-47.3144	0.13284		-17.5189	0.23229
		-20.4318	0.108514		-17.5324	0.31901
		-24.9667	0.210958		-31.4562	0.21138
		-44.7524	0.267507		-27.7812	0.43746
		-62.5265	0.137655		-32.6405	0.23604
		-73.2838	0.363879		-20.0737	0.25234
		-54.5558	0.16687		-26.4809	0.35204
		-36.6741	0.1279		-13.9289	0.19059
		-61.6406	0.122776		-16.0886	0.57718
		-42.2151	0.141679		-24.1558	0.73714
		-27.9495	0.12761		-20.0854	0.44346
		-18.381	0.266848		-16.7686	0.55897
		-51.2983	0.150717		-29.5219	0.26036
		-18.0965	0.350493		-63.4347	0.3765
		-111.55	0.144881		-19.3636	0.53773
		-117.279	0.131696		-15.2927	0.08921
		-69.0655	0.120219		-53.5826	0.37
		-58.9965	0.104367		-22.3031	0.58488
		-108.527	0.134115		-39.3288	0.2623
		-47.0839	0.126091
		-30.3243	0.176123
		-65.7901	0.114318
		-41.8036	0.374515
		-36.8259	0.170311
		-116.829	0.108922
		-43.6088	0.176445
		-72.0119	0.12954
		-62.3001	0.181925
		-17.1934	0.222935
		-68.3067	0.197632
		-38.5383	0.332021
		-31.5895	0.410849
		-60.3846	0.159667
		-69.0379	0.122977
		-21.2486	0.203663
		-20.3785	0.227916
		-16.3324	0.430492
		-55.4308	0.135671
		-34.9618	0.117451
		-44.7728	0.131747
		-65.3035	0.148276
		-76.5131	0.204499
		-107.318	0.167173
		-35.0645	0.120438
		-36.1871	0.0994549
		-57.8392	0.188454
		-65.3908	0.164078
		-56.3921	0.156525
		-55.8605	0.15673
		-20.7214	0.219303
		-65.6321	0.155437
		-61.7981	0.166384
		-51.3076	0.182246
		-63.5703	0.19956
		-171.814	0.146417
		-69.0445	0.20029
		-87.4452	0.121338
		-21.5483	0.198185
		-161.895	0.123297
		-33.8546	0.160306
		-30.9733	0.258663
		-66.1884	0.185696
		-20.0242	0.198753
		-61.2827	0.16393
		-65.7859	0.255486
		-32.7452	0.186294
		-43.8628	0.103268
		-32.9532	0.367399
		-26.9249	0.124315
		-41.4498	0.101814
		-16.5595	0.280925
		-29.7818	0.156408
		-66.2137	0.151304
		-43.8404	0.186837
		-46.4617	0.167375
		-41.1197	0.216477
		-12.7262	0.233131
		-30.7662	0.276182
		-50.7641	0.141346
		-40.9698	0.250794
		-25.527	0.255944
		-26.4051	0.217957
		-51.0907	0.292139
		-13.6572	0.24243
		-21.5951	0.174011
		-70.8195	0.16712
		-50.8838	0.262351
		-33.8491	0.0963163
		-45.89	0.2103
		-24.7434	0.143079
		-34.276	0.142364
		-52.7974	0.320319
		-51.8742	0.171167
		-123.81	0.128538
		-71.1631	0.292377
		-24.6798	0.259739
		-38.7295	0.137129
		-87.5038	0.121348

## Sheet: Panel 1C 
Figure 1 C				mEPSC - immature SC
				Age	Freq (Hz)	nb of events	amp (pA)	rise time (ms)	tau decay (ms)
		MEAN		17.3077	1.36898	91.1538	48.2097	0.158741	0.67931		Statistical Test Performed
		SEM		0.208309	0.270007	18.3446	3.58285	0.0124858	0.0608618		Mann-Whitney			P value
		n		13	13	13	13	13	13		EPSC amplitude			2.17583e-05
		min		17	0.406667	16	32.152	0.115342	0.407765		EPSC Rise time			0.00284
		max		19	3.2	253	78.1046	0.291	1.29151		EPSC decay			0.000300117
											EPSC Frequency			0.82714
				19	0.741379	43	41.44	0.291	1.29151
				19	0.585106	55	32.152	0.198	0.765116
				17	3.2	16	70.7025	0.115342	0.407765
				17	2.69231	70	40.631	0.141931	0.519308
				17	0.791667	95	49.6204	0.123604	0.569121
				17	1.91919	190	53.1254	0.144351	0.680089
				17	1.57778	142	46.017	0.146	0.554795
				17	1	61	39.152	0.132	0.639559
				17	2.81111	253	38.791	0.146	0.844784
				17	0.741573	66	43.626	0.155779	0.559987
				17	0.5	50	43.9983	0.154	0.626388
				17	0.406667	61	49.3659	0.140412	0.579955
				17	0.83	83	78.1046	0.17521	0.792655
				mEPSC - Adult SC
				Age	Freq (Hz)	nb of events	amp (pA)	rise time (ms)	tau decay (ms)
		MEAN		45.0714	1.13604	103.643	23.4339	0.23707	1.31381
		SEM		1.86484	0.132971	8.08921	2.33194	0.0182604	0.144557
		n		14	14	14	14	14	14
		min		34	0.56917	67	8.6649	0.127	0.674557
		max		57	2.19444	163	36.52	0.373	2.79996
				37	1.01754	145	16.79	0.373	1.83979
				44	1.72669	163	8.6649	0.228	1.267
				44	0.932331	124	10.818	0.213	2.79996
				44	0.56917	72	21.6221	0.234423	1.1367
				44	0.851334	67	16.418	0.288	1.34
				42	1.75	84	28.9116	0.176645	0.776716
				54	0.695971	95	22.395	0.241	1.418
				54	0.781457	118	27.9331	0.225668	1.11998
				54	0.586592	105	21.0961	0.333673	1.52387
				41	2.19444	79	28.409	0.216	0.973
				41	1.00524	96	35.454	0.127	0.792012
				41	1.65217	76	33.5722	0.142073	0.674557
				57	1.05185	142	19.47	0.3	1.58963
				34	1.08974	85	36.52	0.2205	1.14211

## Sheet: Panel 1D
Figure 1 D		Immature SC
		CTL	gDGG		CTL		gDGG
		Amp (pA)	Amp (pA)		Histogram bin centers	Number of values	Histogram bin centers	Number of values
		-99.2539	-25.6015		-198.94	0	-198.94	0
		-47.5611	-34.4211		-188.94	1	-188.94	0
		-55.7047	-60.4999		-178.94	1	-178.94	0
		-49.2416	-29.3312		-168.94	0	-168.94	0
		-121.838	-13.4866		-158.94	2	-158.94	0
		-40.776	-24.6808		-148.94	0	-148.94	0
		-92.3559	-37.7001		-138.94	0	-138.94	0
		-52.1245	-10.3708		-128.94	1	-128.94	0
		-35.4116	-53.9503		-118.94	1	-118.94	0
		-27.3624	-21.6508		-108.94	1	-108.94	0
		-57.9791	-10.8735		-98.94	2	-98.94	0
		-6.67533	-44.6991		-88.94	1	-88.94	0
		-34.8359	-17.636		-78.94	0	-78.94	4
		-46.9265	-9.83389		-68.94	2	-68.94	5
		-156.881	-69.6091		-58.94	8	-58.94	10
		-63.4395	-17.3831		-48.94	6	-48.94	21
		-18.8744	-10.6157		-38.94	2	-38.94	41
		-49.0618	-11.5377		-28.94	2	-28.94	42
		-176.751	-46.0495		-18.94	5	-18.94	50
		-57.5839	-16.8493		-8.94	1	-8.94	0
		-40.478	-32.3392
		-16.0998	-39.8222
		-148.514	-53.1699
		-60.2281	-33.202
		-18.7459	-24.9706
		-187.533	-49.5119
		-20.4915	-12.9919
		-52.0308	-46.3517
		-44.6094	-10.3167
		-110.63	-19.7809
		-15.4564	-12.2695
		-40.0358	-22.206
		-12.1624	-18.3904
		-98.4153	-43.1997
		-53.288	-47.3777
		-80.0465	-65.6664
			-42.9329
			-22.3023
			-20.0383
			-22.9054
			-27.1467
			-12.1896
			-24.1208
			-9.80722
			-20.1812
			-10.8351
			-17.2571
			-37.374
			-23.3181
			-32.9977
			-27.6941
			-58.5967
			-32.0894
			-9.77144
			-35.2286
			-36.8169
			-54.6727
			-47.9525
			-39.0069
			-43.5073
			-24.1993
			-18.3492
			-14.9802
			-11.6855
			-36.0151
			-23.1846
			-22.0006
			-18.2038
			-30.1483
			-27.6381
			-23.4566
			-41.4922
			-32.0674
			-35.6021
			-32.7767
			-15.9606
			-30.1447
			-28.4828
			-11.7122
			-24.9027
			-17.8169
			-41.0359
			-11.5883
			-40.5563
			-28.9902
			-28.0967
			-25.7173
			-17.3848
			-76.0234
			-21.3623
			-30.7967
			-69.3563
			-19.1269
			-43.4052
			-34.7719
			-39.5873
			-31.9474
			-28.8233
			-30.1584
			-11.6306
			-74.8632
			-26.615
			-56.9385
			-64.3204
			-34.1231
			-26.0608
			-47.2275
			-30.886
			-21.1372
			-18.5876
			-31.7887
			-65.6956
			-34.6845
			-51.1812
			-16.839
			-27.2316
			-45.4558
			-13.6086
			-44.8752
			-28.4916
			-15.4004
			-24.399
			-14.2981
			-17.1889
			-9.94757
			-35.8675
			-26.4793
			-23.1547
			-24.4484
			-28.8272
			-10.4535
			-32.2068
			-18.3786
			-36.1817
			-13.928
			-29.7251
			-34.0433
			-12.9109
			-37.4301
			-35.4221
			-12.7216
			-34.7515
			-35.7399
			-29.2855
			-42.7103
			-50.5076
			-15.9975
			-22.1123
			-10.8835
			-39.031
			-17.0707
			-15.4996
			-19.0216
			-17.9218
			-21.3027
			-12.7741
			-37.5063
			-21.7272
			-33.0752
			-12.7488
			-17.3751
			-17.834
			-38.9762
			-14.9073
			-26.7355
			-31.4052
			-30.8642
			-52.3587
			-29.3985
			-67.6253
			-33.1883
			-50.1977
			-20.5608

## Sheet: Panel1E
Figure 1E
		Immature SC									Immature SC	Adult SC
		mEPSC amp (pA)			Statistical Test Performed						% peak mEPSC reduction			Statistical Test Performed
		CTL	gDGG		Mann-Whitney			P value		MEAN	44.4194	42.3826		Mann-Whitney			P value
		93.9494	40.8787		Amp CTL vs gDGG			0.00217		SEM	4.35578	3.68658		% peak reduction			0.83234
		56.8903	32.9272							n	7	9
		68.1217	28.5623							min	29.9977	24.1989
		57.7347	35.7078							max	58.0717	61.2299
		61.8202	28.893
		61.7154	43.2022								56.4886	50.9852
		58.2873	39.1451								42.1216	45.12
		58.5356	28.6911								58.0717	30.6594
											38.1519	39.6546
											53.2629	24.1989
		Adult SC									29.9977	40.1004
		mEPSC amp (pA)			Statistical Test Performed						32.8411	61.2299
		CTL	gDGG		Mann-Whitney			P value				49.7428
		34.2152	18.7773		Amp CTL vs gDGG			0.00472				39.7521
		33.4583	23.2002
		65.4864	39.518
		40.0634	30.3685
		25.8117	15.4611
		32.9264	12.7656
		37.9233	19.0592
		36.3797	21.918

## Sheet: Panel 1F
Figure 1F
		Immature SC								Immature SC
		mEPSC RT (ms)			Statistical Test Performed					mEPSC decay (ms)			Statistical Test Performed
		CTL	gDGG		Mann-Whitney			P value		CTL	gDGG		Mann-Whitney			P value
		0.15495	0.20668		Amp CTL vs gDGG			0.5229		0.87382	0.85371		Amp CTL vs gDGG			0.44329
		0.22376	0.19759							0.72839	0.75435
		0.17951	0.17988							0.71795	0.70033
		0.14199	0.17243							0.59079	0.67158
		0.15709	0.15547							0.64782	0.55749
		0.15003	0.15135							0.74092	0.62162
		0.14577	0.13386							0.68344	0.52789
		Adult SC								Adult SC
		mEPSC RT (ms)			Statistical Test Performed					mEPSC decay (ms)			Statistical Test Performed
		CTL	gDGG		Mann-Whitney			P value		CTL	gDGG		Mann-Whitney			P value
		0.16019	0.16239		Amp CTL vs gDGG			0.0934		0.67435	0.72436		Amp CTL vs gDGG			0.5365
		0.15743	0.1585							0.6617	0.70741
		0.17564	0.22505							1.08054	0.89667
		0.14936	0.1738							0.73686	0.76073
		0.20819	0.19174							0.8358	0.82929
		0.19074	0.24649							0.96399	0.80807
		0.18782	0.23776							0.77869	0.77216
		0.1637	0.32485							0.87136	0.78683
		0.23393	0.23955							0.95756	0.84611
