# Supplementary material for: Developmental emergence of two-stage nonlinear synaptic integration in cerebellar interneurons
Source: eLife. 2021 Nov 3;10:e65954. doi: 10.7554/eLife.65954 (PMC8565927; doi:10.7554/eLife.65954)
Supplement: Figure 2—source data 1. [file elife-65954-fig2-data1.xlsx]

## Sheet: Panel 2B
		Immature SC		Adult SC			Immature SC	Adult SC			Immature SC											Immature SC
Figure 2B		dendritic diameters (um)				dendritic diameters (um)					dendritic diameters (um)											dendritic diameters (um)
		All measures	per dendritic segments	All measures		Histogram bin centers	Number of values	Number of values			All measures											All measures
	MEAN	0.464508	0.47428	0.411755		0.2	0	1		MEAN	0.600251	0.511619	0.427037	0.432171		Statistical Test Performed					MEAN	0.370918	0.446795	0.313454	0.550773	0.553008	0.544315	0.512129	0.575834	0.557184	0.446795	0.396276	0.570378
	SEM	0.00732822	0.0135463	0.0149663		0.25	4	9		SEM	0.0456475	0.022382	0.0185811	0.0234197		Mann-Whitney			P value		SEM	0.0195801	0.0348877	0.00622608	0.0388403	0.0268157	0.0471394	0.0317361	0.0519914	0.0236783	0.0348877	0.0272216	0.0401789
	n	430	93	78		0.3	16	20		n	26	43	34	18		1 vs. 2			0.1971		n	8	8	7	4	5	5	5	8	9	8	20	11
	min	0.2432	0.262	0.242293		0.35	9	16		min	0.280023	0.280153	0.272785	0.265456		2 vs. 3			0.0141		min	0.265806	0.343108	0.291318	0.478397	0.483781	0.436386	0.41387	0.353916	0.47319	0.343108	0.261678	0.464452
	max	1.2089	0.933	0.908596		0.4	13	14		max	1.20892	0.809328	0.655521	0.598943		3 vs. 4			0.0465		max	0.431095	0.648931	0.33777	0.658809	0.63679	0.712807	0.576547	0.797351	0.675714	0.648931	0.788268	0.933078
						0.45	12	5		Branch order	1	2	3	4							SC number	1	2	3	4	5	6	7	8	9	10	11	12
		0.4051		0.242293		0.5	18	3			0.429668	0.586354	0.653873	0.444299								0.265806	0.648931	0.33777	0.658809	0.483781	0.436386	0.41387	0.797351	0.47319	0.648931	0.261678	0.933078
		0.3772		0.253542		0.55	7	1			0.63679	0.444219	0.519124	0.560093								0.312342	0.504692	0.325034	0.549631	0.516598	0.496137	0.460398	0.743324	0.489175	0.504692	0.304616	0.649373
		0.5049		0.259973		0.6	5	5			0.527517	0.514415	0.372208	0.419972								0.367837	0.476689	0.322046	0.516255	0.541515	0.506447	0.554018	0.66328	0.512395	0.476689	0.305062	0.618502
		0.3463	0.408	0.276441		0.65	4	1			1.16984	0.541515	0.499042	0.589492								0.383654	0.425621	0.311584	0.478397	0.586354	0.569797	0.555811	0.539259	0.517819	0.425621	0.315178	0.560093
				0.284492		0.7	2	0			0.741278	0.762335	0.453325	0.598943								0.389045	0.422016	0.311141		0.63679	0.712807	0.576547	0.51324	0.54476	0.422016	0.318084	0.538781
		0.3882		0.285929		0.75	2	0			0.978875	0.658991	0.533246	0.421992								0.408373	0.403133	0.295286					0.502144	0.548994	0.403133	0.324356	0.529152
		0.3899	0.389	0.28602		0.8	0	1			0.748417	0.453472	0.463216	0.411171								0.409194	0.35017	0.291318					0.494159	0.600747	0.35017	0.332224	0.519124
				0.289011		0.85	0	1			0.598385	0.56668	0.39599	0.353916								0.431095	0.343108						0.353916	0.651859	0.343108	0.344504	0.49376
		0.3076		0.293294		0.9	1	1			0.577585	0.809328	0.639542	0.411231																0.675714		0.347558	0.484432
		0.3864		0.298259		0.95	0	0			0.581423	0.504931	0.516124	0.524213																		0.349555	0.483414
		0.2563		0.303094		1	0	0			0.555593	0.452754	0.454389	0.530302																		0.352938	0.464452
		0.2991	0.312	0.303792							1.20892	0.498111	0.41387	0.402285																		0.368815
				0.304764							0.677775	0.709068	0.655521	0.410613																		0.386163
		0.3537		0.309625							0.603058	0.391404	0.51324	0.484432																		0.396399
		0.4036		0.320196							0.687147	0.546972	0.464705	0.349778																		0.407219
		0.4216		0.323982							0.612117	0.703232	0.481581	0.296519																		0.416821
		0.3619		0.325693							0.697649	0.681231	0.49312	0.265456																		0.500449
		0.3604		0.326701							0.323151	0.637814	0.516124	0.304377																		0.533439
		0.535		0.333415							0.497546	0.650789	0.514011																			0.57219
		0.4216		0.333847							0.42292	0.628449	0.37151																			0.788268
		0.4588		0.334068							0.40833	0.669067	0.348419
		0.4043		0.335223							0.421464	0.675714	0.388227
		0.59	0.431	0.335578							0.280023	0.474535	0.307601
				0.336037							0.37493	0.632397	0.353676
		0.2874		0.3402							0.489517	0.461667	0.287408
		0.2442	0.266	0.340665							0.356618	0.441368	0.317086
				0.343667								0.436954	0.272785
		0.366		0.345628								0.507769	0.274437
		0.355		0.349281								0.511339	0.340048
		0.3697		0.349518								0.405122	0.277572
		0.4497		0.350262								0.57219	0.368742
		0.4013		0.356468								0.361653	0.379465
		0.3491		0.356673								0.31795	0.279616
		0.3264		0.357681								0.317036	0.400407
		0.3664		0.35859								0.337361
		0.46		0.359611								0.280153
		0.3258		0.365272								0.323511
		0.4508	0.384	0.379521								0.788268
				0.380336								0.430473
		0.3171		0.380995								0.417702
		0.3982		0.382288								0.290649
		0.3842		0.386683								0.305053
		0.4529		0.388938								0.299638
		0.3484		0.390151
		0.3063	0.368	0.392224
				0.396654
		0.4092	0.409	0.401442
				0.404313
		0.3232		0.408928
		0.3645		0.412318
		0.4143		0.412477
		0.3093		0.41615
		0.3105		0.416688
		0.2432		0.41717
		0.3844		0.421507
		0.3232		0.422072
		0.5368		0.425488
		0.3436		0.432134
		0.3055		0.445195
		0.3769	0.353	0.445253
				0.455649
		0.5334	0.533	0.456012
				0.472359
		0.5722	0.572	0.480065
				0.487369
		0.3617		0.511189
		0.3028	0.332	0.530985
				0.538034
		0.4975		0.590527
		0.5531		0.600547
		0.4507	0.5	0.616192
				0.626308
		0.4229		0.631297
		0.4961		0.633224
		0.3299		0.674567
		0.4008		0.808933
		0.4542		0.867292
		0.3969	0.417	0.908596
		0.4083
		0.3064
		0.3187
		0.3648	0.35
		0.3179
		0.4544	0.386
		0.317
		0.3148
		0.3148
		0.2875
		0.3417	0.315
		0.2728
		0.3759	0.324
		0.3579
		0.8665
		0.3531
		0.3581
		0.3617
		0.2514
		0.3017	0.407
		0.3374
		0.3551
		0.2899
		0.3488
		0.2474
		0.323
		0.2831
		0.2692
		0.3009
		0.2959	0.305
		0.2802
		0.304
		0.3648
		0.3171
		0.26
		0.3017	0.305
		0.4215
		0.3696
		0.2911
		0.2959	0.345
		0.3235
		0.4141	0.369
		0.2744
		0.2489
		0.2758	0.262
		0.28
		0.3561	0.318
		0.7883	0.788
		0.4294
		0.4316
		0.34
		0.3291
		0.3256
		0.3459
		0.2776
		0.3013	0.348
		0.3749
		0.4606
		0.4106
		0.3329
		0.4272
		0.372	0.396
		0.4895
		0.4387
		0.3967	0.442
		0.2906
		0.357
		0.331
		0.3687
		0.2903
		0.3923
		0.3498
		0.2739
		0.2878
		0.3371
		0.2989
		0.3471
		0.3009	0.325
		0.3795
		0.3581
		0.2874
		0.2931
		0.2901
		0.324	0.322
		0.2796
		0.3282
		0.2964
		0.2748
		0.2584
		0.3217
		0.2759
		0.2965
		0.3178
		0.2827
		0.3162	0.295
		0.2655
		0.3351
		0.2648
		0.2999	0.291
		0.3044
		0.2952
		0.3064
		0.3386	0.311
		0.3566
		0.3051
		0.3152
		0.3116
		0.4004	0.338
		0.2996
		0.3815
		0.319
		0.3115
		0.2761
		0.2817	0.312
		0.3958
		0.42
		0.4766
		0.535
		0.38
		0.3631
		0.3936	0.43
		0.4764
		0.3976
		0.4643
		0.4271
		0.4783
		0.3705
		0.4211
		0.4091
		0.4339	0.431
		0.6885
		0.5851	0.637
		0.6723
		0.5005	0.586
		0.4442
		0.525
		0.4549
		0.5135
		0.4812	0.484
		0.5275
		0.5789
		0.6725
		0.4486
		0.3632
		0.5088	0.517
		0.767
		0.5437
		0.5287
		0.4238
		0.4443	0.542
		1.1698
		0.7623
		0.8671	0.933
		0.659
		0.6539
		0.5165
		0.4783
		0.3381	0.529
		0.4596
		0.6606	0.56
		0.4162
		0.6451
		0.4961	0.519
		0.3722
		0.6891
		0.42	0.494
		0.5895
		0.4106
		0.5047
		0.549
		0.3633	0.483
		0.4844	0.484
		0.7413
		0.8571
		0.5456
		0.4535	0.649
		0.5667
		0.5506
		0.499	0.539
		0.4533
		0.4792
		0.4609	0.464
		0.5851
		0.6843
		0.6468
		0.5578	0.619
		0.9789
		0.9593
		0.8093
		0.5332
		0.6726
		0.514
		0.5989
		0.6361	0.713
		0.4632
		0.546
		0.5176
		0.4577	0.496
		0.5049
		0.4662
		0.5695
		0.5042
		0.4874	0.506
		0.396
		0.4466
		0.5234
		0.3795	0.436
		0.6395
		0.5001	0.57
		0.7484
		0.614
		0.614	0.659
		0.4528
		0.5837
		0.4716
		0.4056	0.478
		0.4981
		0.6012	0.55
		0.5984
		0.7091
		0.5161
		0.3524
		0.5351
		0.4807
		0.422	0.516
		0.4865
		0.6375
		0.6087
		0.3914
		0.6301
		0.7252
		0.4112	0.556
		0.5814
		0.6308
		0.5622
		0.5318	0.577
		0.4544
		0.4664	0.46
		0.4698
		0.3579	0.414
		0.5943
		0.6021
		0.5647
		0.5508
		0.5401
		0.6311
		0.5255
		0.5886
		0.4864
		0.3814
		0.6291	0.554
		0.5556
		0.6506
		0.7032
		0.8854
		0.61
		0.6555
		0.5826	0.663
		0.5726
		0.4539	0.513
		0.3539	0.354
		0.6812
		0.8538
		0.857	0.797
		1.2089
		0.6378
		0.8435
		0.7353
		0.5382
		0.6733
		0.6508
		0.8345
		0.5675	0.743
		0.4647
		0.5181
		0.5237	0.502
		0.4816
		0.5721
		0.4288	0.494
		0.6284
		0.5634
		0.5132
		0.452	0.539
		0.6778
		0.6691
		0.4554	0.601
		0.6757	0.676
		0.4931
		0.5019
		0.5284
		0.4332	0.489
		0.6031
		0.5447
		1.0129
		0.572
		0.5267	0.652
		0.6871
		0.5854
		0.4968
		0.4805
		0.4112
		0.467
		0.4903
		0.5242	0.518
		0.4745
		0.5775
		0.5347
		0.7026
		0.6324
		0.4876
		0.46
		0.5174
		0.5161	0.545
		0.514
		0.4664
		0.5036
		0.3846
		0.4974	0.473
		0.6121
		0.7223
		0.4197
		0.5485
		0.5297
		0.4617	0.549
		0.4414
		0.5736
		0.5222	0.512
		0.6976
		0.7736
		1.0102
		0.4161
		0.5827
		0.6949
		0.4861
		0.5303	0.649
		0.4023
		0.3766
		0.3579
		0.5512	0.422
		0.3715
		0.3524
		0.3054	0.343
		0.437
		0.5046
		0.3875
		0.4348
		0.3643	0.426
		0.3484
		0.3519	0.35
		0.5078
		0.4673
		0.5323
		0.5113	0.505
		0.6278
		0.4931
		0.4384
		0.4993
		0.3865
		0.4149	0.477
		0.4179
		0.3754
		0.544
		0.3141
		0.3448
		0.4225	0.403

## Sheet: Panel 2C
		simulated qEPSC - immature SC
		Peak Amp (pA)			RT (ms)			Half-width (ms)
	Distance from soma (um)	Ra 100	Ra 150	Ra 200	Ra 100	Ra 150	Ra 200	Ra 100	Ra 150	Ra 200
	soma	59.6074	62.4967	64.235	0.138302	0.137237	0.136662	0.616733	0.591402	0.58029
	15	48.0574	46.4081	44.7027	0.169854	0.170439	0.172757	0.767811	0.77169	0.774711
	25	42.7263	39.3851	36.6357	0.195661	0.198193	0.201042	0.854886	0.899024	0.92936
	35	39.4031	34.9984	31.5437	0.224089	0.23121	0.236358	0.915759	1.00163	1.07177
	45	37.2412	32.2995	28.4181	0.250626	0.267793	0.280107	0.95193	1.06671	1.17113
	55	35.6396	30.4139	26.4143	0.270969	0.30054	0.325145	0.97211	1.1019	1.22618
	65	34.4965	29.1787	25.1889	0.280234	0.318007	0.350502	0.982087	1.11666	1.24702
	75	33.3973	28.0907	24.0675	0.285474	0.325882	0.361742	0.990271	1.12709	1.2603
	85	32.3834	26.8275	22.8031	0.288096	0.330406	0.368382	0.999573	1.1397	1.27571

## Sheet: Panel 2F
Figure 2F		simulated qEPSC - immature SC
		Peak Amp (pA)
	Distance from soma (um)	Ra 100	Ra 150	Ra 200
	soma	59.4477	64.0085	67.3035
	5	57.0789	59.7908	61.9057
	15	52.2785	52.16	51.6689
	25	49.1805	47.1668	45.0129
	35	47.4022	44.2445	41.2372
	45	45.7445	41.8604	38.2969
	55	44.5732	40.3386	36.575
	65	43.4546	38.9561	35.1054
	75	42.2082	37.5509	33.4459

## Sheet: Panel 2H
Figure 2H		simulated qEPSC - Adult SC
		Peak Amp (pA)
	Distance from soma (um)	Ra 100	Ra 150	Ra 200
	soma	39.3847	44.5768	48.5826
	5	37.6921	41.9146	45.3842
	15	29.0171	29.5548	30.2167
	25	25.474	23.8623	23.1301
	35	24.0603	21.3188	19.5042
	45	23.356	20.236	17.9373
	55	22.9048	19.6855	17.2956
	65	22.464	19.1182	16.687
	75	21.9503	18.5699	16.0549
