# Supplementary material for: Developmental emergence of two-stage nonlinear synaptic integration in cerebellar interneurons
Source: eLife. 2021 Nov 3;10:e65954. doi: 10.7554/eLife.65954 (PMC8565927; doi:10.7554/eLife.65954)
Supplement: Figure 3—source data 1. [file elife-65954-fig3-data1.xlsx]

## Sheet: Panel 3D
Figure 3D			Immature SC
			somatic qEPSC
			Age	nb of events	amp (pA)	rise time (ms)	Half-width (ms)			Statistical Test Performed
	MEAN		15.88	23.4	62.2946	0.142858	0.602112			Mann-Whitney			P value
	SD		0.725718	8.12917	16.5096	0.0217926	0.095736			EPSC amplitude			0.00131
	SEM		0.145144	1.62583	3.30192	0.00435852	0.0191472			EPSC Rise time			4.31203e-08
	n		25	25	25	25	25			EPSC half-with			1.48502e-06
	min		14	12	41.334	0.09805	0.44
	max		17	39	95.1738	0.176575	0.767986
			16	18	43.0558	0.176575	0.617249
			16	22	55.0807	0.121993	0.571555
			16	25	54.37	0.129	0.524323
			16	22	50.9	0.103	0.44
			16	12	85.3856	0.1395	0.54219
			17	21	55.4492	0.118842	0.47
			16	37	83.04	0.16427	0.6299
			16	15	88.27	0.1651	0.6742
			15	29	47.749	0.09805	0.487
			16	12	89.5456	0.169413	0.487
			17	16	65.6409	0.154312	0.657675
			15	32	61.0103	0.157412	0.75038
			16	31	79.624	0.158783	0.61
			15	18	53.6711	0.165095	0.56579
			16	19	95.1738	0.133993	0.767986
			16	22	53.0164	0.160673	0.738254
			17	25	42.0182	0.156795	0.645616
			16	15	42.3631	0.156962	0.74
			16	12	59.3403	0.10645	0.5
			15	29	68.0919	0.132433	0.577035
			15	36	47.8527	0.13742	0.694972
			16	24	59.2839	0.158195	0.70597
			16	39	59.1374	0.13262	0.537413
			17	20	41.334	0.141999	0.583744
			14	34	76.9618	0.132554	0.534548
			Dendritic qEPSC
			Age	nb of events	amp (pA)	rise time (ms)	Half-width (ms)
	MEAN		15.9444	26.9444	46.3617	0.235952	0.879749
	SD		1.16175	22.1399	14.0508	0.0503147	0.161588
	SEM		0.273828	5.21841	3.31181	0.0118593	0.0380867
	n		18	18	18	18	18
	min		14	7	23.62	0.171371	0.669768
	max		18	94	83.0769	0.336	1.15
			14	8	83.0769	0.214401	0.900902
			16	52	38.82	0.204	0.7
			16	7	36.3327	0.218971	0.669768
			16	21	38.6257	0.212495	0.747687
			16	25	34.2159	0.286641	0.981621
			16	11	23.62	0.281402	0.698049
			17	8	36.47	0.27	1.06
			17	44	67.4319	0.174049	0.82
			17	7	48.64	0.25	0.92
			14	28	60.1407	0.187635	0.826987
			17	13	47.8963	0.254317	1.00551
			14	39	58.15	0.180398	0.752091
			15	19	42.22	0.336	1.15
			18	94	39.9	0.246595	1.06909
			16	14	42.28	0.171371	0.722975
			15	39	46.42	0.32095	1.11082
			17	14	54.34	0.18	0.7
			16	42	35.93	0.257909	0.999985

## Sheet: Panel 3G
Figure 3G		Immature SC
		SC1		SC2
		distance from soma	PSD area (um2)	distance from soma	PSD area (um2)
		0	0.0312749	0	0.0303898
		0	0.0275387	0	0.0269874
		0	0.0302686	0	0.0352141
		0	0.0250757	0	0.0210291
		0	0.044181	0	0.0205167
		0	0.0252284	0	0.0119778
		0	0.0242531	0	0.0355061
		0	0.0387866	0	0.037998
		0	0.019069	0	0.0228225
		0	0.0301239	0	0.0224972
		0	0.0774914	0	0.011065
		0	0.0199426	0	0.00669053
		0	0.0160646	0	0.00126
		0	0.0142924	0	0.00510125
		0	0.0254976	0	0.00858284
		0	0.0329511	0	0.0127956
		0	0.0270102	0	0.00490665
		0	0.029611	0	0.00534702
		0	0.0351959	0	0.00714343
		0	0.0266157	0	0.00974981
		0	0.0152753	0	0.00699174
		0	0.0258144	0	0.00470701
		0	0.0276864	0	0.0708656
		0	0.0226615	0	0.0369545
		0	0.0259071	0	0.0420412
		0	0.0161729	0	0.045599
		0	0.0134413	0	0.0440873
		0	0.0123901	0	0.0267044
		0	0.0113345	0	0.0291766
		0	0.0147655	0	0.0195419
		0	0.00871836	0	0.0297882
		0	0.0114675	0	0.0170545
		0	0.0163748	0	0.00929712
		0	0.0152211	0	0.0182374
		0	0.00794857	0	0.00854119
		0	0.012879	0	0.00959903
		0	0.00905856	0	0.0133633
		0	0.0107679	0	0.0452803
		0	0.00654276	0	0.0619744
		0	0.00829318	0	0.0216954
		0	0.0153637	0	0.0397502
		0	0.010909	0	0.0198274
		0	0.0117283	0	0.0790325
		0	0.00995414	0	0.042118
		0	0.013872	0	0.0289697
		0	0.0143294	0	0.0239143
		0	0.0151336	0	0.0333691
		0	0.0121699	0	0.0258529
		0	0.011347	0	0.0193245
		0	0.00890141	0	0.0350772
		0	0.013524	0	0.0261653
		0	0.0171888	0	0.0318189
		0	0.0133737	0	0.014164
		0	0.00976563	0	0.0149589
		0	0.00565061	0	0.0338353
		0	0.0193863	0	0.0193024
		0	0.00762867	0	0.0048454
		0	0.0121882	0	0.0029428
		0	0.0128715	0	0.010357
		0	0.0159038	0	0.0200266
		0	0.00997402	0	0.00941262
		0	0.0156302	0	0.0183438
		0	0.00611408	0	0.00764967
		0	0.0126352	0	0.0138399	Statistical Test Performed
		0	0.018574	0	0.0189282	Spearman correlation
		0	0.0240374	0	0.019119	Young
		107.703	0.00753921	0	0.0128229	Adult
		133.995	0.0223675	0	0.0111952
		257.24	0.0267458	0	0.00771715
		900.622	0.0310956	0	0.0135655
		1358.08	0.0230772	0	0.00908075
		1773.4	0.0291763	0	0.0111565
		1855.32	0.0161226	0	0.0067284
		1919.06	0.0341046	70	0.0150081
		2203.76	0.039879	70	0.0151454
		2648.8	0.0231384	70	0.00871514
		3183.51	0.0193135	143	0.0356087
		3272.39	0.0132415	166	0.0395216
		3278.84	0.0213424	169	0.021645
		3706.83	0.0476477	290	0.0140329
		4324.2	0.0398904	434	0.0148528
		4513.43	0.0454661	740	0.0261073
		4716.59	0.0165629	1535	0.0277813
		6054.4	0.0352258	1538	0.0251651
		6371.5	0.0330102	1948	0.0199778
		6472.69	0.0238069	2575	0.00936019
		6532.02	0.0414072	3015	0.0149871
		6786.8	0.0340641	3181	0.0326901
		7320.76	0.0239672	3215	0.00759402
		7739.34	0.0455174	3258	0.0248418
		7838.45	0.01288	3379	0.0183856
		7975.53	0.0290369	3388	0.0124837
		8322.78	0.0447114	3463	0.0223889
		9018.29	0.0224901	3511	0.0419249
		9272.21	0.0458961	3606	0.021645
		9292.28	0.0569341	3867	0.0407546
		9322.96	0.0320792	3920	0.0298257
		9338	0.0239262	4151	0.0294974
		9543	0.0321474	4201	0.0355179
		9550.39	0.0125567	4319	0.0238615
		9720.27	0.0333852	4366	0.0225716
		9747.34	0.0664574	4366	0.0160583
		9942.56	0.00854805	4386	0.018738
		9982.23	0.0168183	4574	0.0217709
		10145.5	0.0234591	4591	0.0455337
		10264.9	0.0234847	4721	0.0158036
		10290.2	0.0276429	4755	0.0153495
		11009.6	0.0566644	4821	0.0141
		11533.2	0.0468195	5562	0.011897
		12903.9	0.0195368	5630	0.0249038
		12951.8	0.0189428	5798	0.0238753
		13187.4	0.019336	6172	0.0270794
		13284.3	0.0371804	6180	0.0180189
		13805.7	0.0147608	6530	0.0234787
		14177.2	0.0118206	6694	0.00449505
		14312.1	0.0286755	6703	0.0127569
		14401.9	0.0126947	6933	0.015709
		14911.7	0.0140311	6943	0.0465583
		14966.9	0.03381	6943	0.0465583
		15267.2	0.0452662	6953	0.0243805
		15342.1	0.0507649	6974	0.00499758
		15454.2	0.0147856	6975	0.0435167
		15698	0.0414928	7325	0.0237852
		15762.2	0.0369424	7390	0.00773878
		16456.1	0.0312592	7503	0.00906717
		16535.6	0.0344017	7523	0.0415264
		17302.4	0.0163314	8054	0.022052
		18985.2	0.0358123	8239	0.0106513
		19066.2	0.0109808	8239	0.00618261
		19314.5	0.0368511	8507	0.0218796
		19596.2	0.0421361	8568	0.017044
		19641.9	0.0139651	9377	0.0147409
		19677	0.0343602	9435	0.0139334
		20069.7	0.0115251	9691	0.0167648
		20268.6	0.0138654	10486	0.0204497
		20297.5	0.0190795	10607	0.0130038
		20977.6	0.013927	11998	0.0870333
		21893.8	0.0208036	12162	0.0170974
		22023	0.0247087	12334	0.0370983
		22042.1	0.0249783	12530	0.0254624
		23304	0.0130441	13307	0.018382
		24328.8	0.035821	13616	0.0341063
		25063.5	0.0124671	14028	0.0171399
		25510.9	0.0224344	14340	0.019334
		25848.9	0.0351042	14516	0.0195343
		25906.1	0.00950719	14604	0.0394796
		26590.9	0.0349934	14692	0.0254917
		27123.6	0.00536039	15079	0.058808
		27604.3	0.0466318	16178	0.0889704
		28781.6	0.017696	16186	0.0345591
		29332.3	0.0160805	16785	0.016526
		31349.7	0.0385358	16903	0.0127205
		32413.5	0.0280349	17202	0.0115917
		32574.9	0.0247993	17426	0.0131846
		32785.8	0.0170496	17838	0.0311075
		35146.4	0.035218	18025	0.0117324
		37342.1	0.0232717	18411	0.0192172
		39364.5	0.0193003	18804	0.0331845
		40037.1	0.0540635	18857	0.0138332
		40923.8	0.0279185	18958	0.0194305
		42028	0.0145223	18987	0.0390563
		44692.7	0.00952735	19082	0.0363084
		44748.5	0.0168148	19222	0.0114008
		46648.7	0.024026	19262	0.0179996
		46978.8	0.0234441	19440	0.0281664
		48098	0.0440268	19488	0.00840357
		49337.3	0.0384904	19526	0.0360128
		49461.6	0.011555	19556	0.0383585
		53490.5	0.0256649	19741	0.0120175
		53559.5	0.027478	19803	0.0109503
		56385	0.0252526	20136	0.00813932
		56713.7	0.0248181	20548	0.0173512
				20712	0.00477729
				21445	0.0218953
				21611	0.0303892
				23177	0.0158424
				23308	0.0203206
				23352	0.00882875
				23367	0.0134459
				23497	0.0265405
				23571	0.0229529
				23739	0.0172017
				24219	0.0315942
				24385	0.0157249
				24627	0.013616
				24972	0.0191239
				25341	0.017473
				28726	0.0341414
				29810	0.016468
				30220	0.0295527
				31591	0.0102066
				31640	0.016526
				31866	0.0157164
				32707	0.0169895
				35614	0.0146235
				35624	0.0351222
				36791	0.0441611
				37002	0.00969808
				37528	0.00899416
				38367	0.0107775
				38521	0.0357184
				38857	0.0129336
				39571	0.0117288
				40053	0.0131771
				40312	0.0348587
				40893	0.0210569
				41678	0.0293059
				42521	0.0105654
				42732	0.0119095
				42879	0.00728224
				43747	0.036056
				44691	0.0175335
				44968	0.0204238
				46505	0.00837991
				46767	0.0116608
				47711	0.014196
				52048	0.0217244
				55510	0.0214297
				56644	0.0133308
				57686	0.00622006
