# Supplementary material for: Developmental emergence of two-stage nonlinear synaptic integration in cerebellar interneurons
Source: eLife. 2021 Nov 3;10:e65954. doi: 10.7554/eLife.65954 (PMC8565927; doi:10.7554/eLife.65954)
Supplement: Figure 4—source data 1. [file elife-65954-fig4-data1.xlsx]

## Sheet: Panel 4B
Figure 4B			somatic qEPSC - immature SC
			Age	nb of events	amp (pA)	rise time (ms)	Half-width (ms)			Statistical Test Performed
	MEAN		15.88	23.4	62.2946	0.142858	0.602112			Mann-Whitney			P value
	SD		0.725718	8.12917	16.5096	0.0217926	0.095736			EPSC amplitude			0.000616862
	SEM		0.145144	1.62583	3.30192	0.00435852	0.0191472			EPSC Rise time			0.00349
	n		25	25	25	25	25			EPSC half-with			0.07432	ns
	min		14	12	41.334	0.09805	0.44
	max		17	39	95.1738	0.176575	0.767986
			16	18	43.0558	0.176575	0.617249
			16	22	55.0807	0.121993	0.571555
			16	25	54.37	0.129	0.524323
			16	22	50.9	0.103	0.44
			16	12	85.3856	0.1395	0.54219
			17	21	55.4492	0.118842	0.47
			16	37	83.04	0.16427	0.6299
			16	15	88.27	0.1651	0.6742
			15	29	47.749	0.09805	0.487
			16	12	89.5456	0.169413	0.487
			17	16	65.6409	0.154312	0.657675
			15	32	61.0103	0.157412	0.75038
			16	31	79.624	0.158783	0.61
			15	18	53.6711	0.165095	0.56579
			16	19	95.1738	0.133993	0.767986
			16	22	53.0164	0.160673	0.738254
			17	25	42.0182	0.156795	0.645616
			16	15	42.3631	0.156962	0.74
			16	12	59.3403	0.10645	0.5
			15	29	68.0919	0.132433	0.577035
			15	36	47.8527	0.13742	0.694972
			16	24	59.2839	0.158195	0.70597
			16	39	59.1374	0.13262	0.537413
			17	20	41.334	0.141999	0.583744
			14	34	76.9618	0.132554	0.534548
			somatic qEPSC - Adult SC
			Age	nb of events	amp (pA)	rise time (ms)	Half-width (ms)
	MEAN		39.8333	34.4167	44.0833	0.119083	0.548946
	SD		5.06024	18.4561	8.38243	0.0155298	0.191411
	SEM		1.46077	5.32783	2.4198	0.00448306	0.0552557
	n		12	12	12	12	12
	min		33	19	26	0.103	0.36
	max		50	72	56	0.155	1.00231
			50	19	56	0.103	0.36
			37	22	26	0.11	0.55
			42	27	42	0.116	0.451111
			43	46	49	0.106	0.44
			42	72	47	0.112	0.426667
			33	23	38	0.138	0.77
			33	28	38	0.112	0.39
			40	22	49	0.116	0.53
			38	26	42	0.155	1.00231
			43	70	53	0.133	0.724
			43	33	38	0.122	0.536061
			34	25	51	0.106	0.4072

## Sheet: Panel 4C
Figure 4C		Soma PSD area (um2)
		Immature SC	Adult SC
	MEAN	0.0386429	0.0280171
	Median	0.03514	0.02537
	SD	0.01809	0.01521
	SEM	0.00198545	0.00154462
	n	83	97
	min	0.0135	0.0070581
	max	0.101576	0.092442
		0.0189	0.092442		Statistical Test Performed
		0.0496	0.03775		Mann-Whitney			P value
		0.0271	0.025367		Immature vs Adult			1.03071e-05
		0.0572	0.020334
		0.0194	0.027593
		0.0701	0.071803
		0.0208	0.030993
		0.0322	0.028967
		0.0423	0.014452
		0.0418	0.017739
		0.0525	0.043638
		0.0328	0.026942
		0.0494	0.023776
		0.0179	0.036817
		0.0464	0.022999
		0.0301	0.014605
		0.0503	0.023998
		0.0306	0.057253
		0.0322	0.041528
		0.0316	0.012009
		0.0214	0.02743
		0.0359	0.018241
		0.0563	0.008177
		0.0395	0.027356
		0.0135	0.023293
		0.0223	0.016423
		0.0259	0.032406
		0.0437	0.020709
		0.0285543	0.0243
		0.0232964	0.014326
		0.0856908	0.022949
		0.0245826	0.0321538
		0.0150694	0.0486339
		0.0556849	0.048132
		0.052907	0.0365162
		0.035142	0.01645
		0.0234508	0.0347333
		0.0705897	0.0254499
		0.0637622	0.032669
		0.0260069	0.0359793
		0.0325619	0.0080325
		0.0312782	0.0689878
		0.0413043	0.0645267
		0.0521302	0.0155736
		0.0822107	0.0207088
		0.0166519	0.01967
		0.0162817	0.0294812
		0.0316772	0.0340641
		0.0261282	0.0257516
		0.0491368	0.034188
		0.0683567	0.0392196
		0.0254408	0.0249445
		0.0368678	0.0305781
		0.0279485	0.0643608
		0.0640571	0.0411586
		0.0258587	0.0234255		Statistical Test Performed
		0.0172553	0.0276493		Spearman correlation			R
		0.0706948	0.0229201		Young			0.18813
		0.0447809	0.0263053		Adult			0.16808
		0.0370608	0.0252112						R value
		0.101576	0.0165494						0.28458
		0.0266676	0.0222684						0.17303
		0.0213001	0.0434084
		0.0227947	0.0557809
		0.0390732	0.0169785
		0.0260132	0.0334866
		0.0363419	0.0133833
		0.0149021	0.0326032
		0.0358299	0.0149506
		0.0309054	0.0135247
		0.0477494	0.0097622
		0.0363153	0.0359247
		0.0493391	0.0149786
		0.056526	0.0070581
		0.0222726	0.0077147
		0.0573965	0.0157948
		0.0433574	0.019411
		0.0713296	0.0141834
		0.0236687	0.0214515
		0.0413818	0.0283689
		0.0361105	0.0211638
		0.0341168	0.029743
		0.0182766	0.0577136
			0.0357098
			0.0242144
			0.0342587
			0.0268912
			0.0102879
			0.0264026
			0.0150402
			0.02149
			0.0133154
			0.0297479
			0.0098175
			0.0229873
			0.0118153
			0.0253918
