# Supplementary material for: Developmental emergence of two-stage nonlinear synaptic integration in cerebellar interneurons
Source: eLife. 2021 Nov 3;10:e65954. doi: 10.7554/eLife.65954 (PMC8565927; doi:10.7554/eLife.65954)
Supplement: Figure 6—source data 1. [file elife-65954-fig6-data1.xlsx]

## Sheet: Panel 6A
Figure 6A
	Normalized PSD95 puncta counts (cummulative histograms)									PSD95 puncta distance to soma (μm) (ALL cells)
	Immature SC			Adult SC
distance from soma	mean	SD	SEM	mean	SD	SEM				Immature SC	Adult SC
0.5	0.0308193	0.0140532	0.00496857	0.0200685	0.0149319	0.00609594				0	1.17632
1.5	0.0393687	0.0144451	0.00510712	0.0290813	0.0208963	0.00853089				0.168294	1.33096
2.5	0.0452808	0.0149907	0.00530002	0.0357605	0.02639	0.0107737				4.46077	1.4856		Statistical Test Performed
3.5	0.0539777	0.0184105	0.00650908	0.0403771	0.0281907	0.0115088				7.66747	1.64024		KS test D			P value
4.5	0.0610351	0.0200158	0.00707666	0.0441184	0.0282743	0.0115429				7.82604	1.79487		0.4042			< 0.0001
5.5	0.0751028	0.0239643	0.00847267	0.0481917	0.0268437	0.0109589				7.98353	1.94952
6.5	0.0876161	0.0248223	0.00877599	0.0511565	0.0264176	0.0107849				8.14061	2.10416
7.5	0.102654	0.0305559	0.0108031	0.0539586	0.0264427	0.0107952				9.07391	2.10416
8.5	0.115263	0.0340385	0.0120344	0.0582153	0.0262868	0.0107315				9.23425	2.25879
9.5	0.135563	0.0337225	0.0119227	0.0621626	0.0255611	0.0104353				9.39395	2.41344
10.5	0.158953	0.0353455	0.0124965	0.0682744	0.0253191	0.0103365				9.55429	2.72278
11.5	0.183203	0.0398357	0.0140841	0.0774167	0.025411	0.010374				9.7204	2.87767
12.5	0.207961	0.0384501	0.0135942	0.0843659	0.0254306	0.010382				9.89295	3.03247
13.5	0.236597	0.0443557	0.0156821	0.0919853	0.0250007	0.0102065				12.0143	3.18821
14.5	0.264364	0.0535439	0.0189306	0.103622	0.0205425	0.00838643				12.195	3.3449
15.5	0.295055	0.0593686	0.02099	0.114001	0.0190504	0.00777729				12.3716	3.3449
16.5	0.322685	0.060057	0.0212334	0.125281	0.0196691	0.00802987				12.5515	3.50542
17.5	0.355755	0.0673902	0.023826	0.139448	0.0210454	0.00859173				13.4172	3.669
18.5	0.38939	0.0701275	0.0247938	0.150993	0.0247355	0.0100982				13.5799	3.83376
19.5	0.417141	0.0740831	0.0261923	0.161765	0.0266541	0.0108815				13.7439	3.99928
20.5	0.446332	0.0763434	0.0269915	0.175659	0.0268963	0.0109804				15.2546	4.16398
21.5	0.469285	0.0798639	0.0282362	0.191665	0.0304939	0.0124491				15.4296	4.32866
22.5	0.501592	0.0891266	0.031511	0.205136	0.0324008	0.0132276				15.6046	4.49341
23.5	0.526507	0.0967565	0.0342086	0.221323	0.0343368	0.014018				15.7825	4.65751
24.5	0.555747	0.0972021	0.0343661	0.2386	0.0373253	0.015238				17.3748	0
25.5	0.581751	0.105081	0.0371519	0.25536	0.0385205	0.0157259				17.5551	0.154653
26.5	0.607789	0.107896	0.0381471	0.270558	0.040019	0.0163377				17.7341	0.309062
27.5	0.632034	0.111885	0.0395572	0.287718	0.0424272	0.0173208				17.9121	0.463021
28.5	0.657913	0.118335	0.0418378	0.305898	0.0445904	0.0182039				21.552	0.616843
29.5	0.688133	0.120454	0.042587	0.322963	0.0476069	0.0194354				21.7275	1.69765
30.5	0.713584	0.12119	0.0428472	0.341672	0.0510434	0.0208384				21.9072	1.85268
31.5	0.734079	0.121354	0.0429051	0.359749	0.0527408	0.0215314				22.0902	2.00767
32.5	0.756741	0.122705	0.0433828	0.377904	0.0542565	0.0221501				22.272	2.16262
33.5	0.772547	0.12325	0.0435754	0.394513	0.0564947	0.0230638				22.4542	8.35305
34.5	0.791794	0.116686	0.0412547	0.412563	0.0569811	0.0232624				24.0559	8.50889
35.5	0.812729	0.11512	0.0407012	0.428986	0.0603003	0.0246175				24.2185	8.6647
36.5	0.830274	0.111029	0.0392548	0.446967	0.0626028	0.0255575				24.3856	8.82082
37.5	0.844406	0.10479	0.0370488	0.464747	0.0657772	0.0268534				24.5604	8.97825
38.5	0.856195	0.103054	0.036435	0.485396	0.0691858	0.028245				24.7415	9.13717
39.5	0.86759	0.099317	0.0351139	0.505084	0.0713839	0.0291423				24.9198	9.29639
40.5	0.877293	0.0963195	0.0340541	0.524272	0.0772299	0.031529				28.5991	9.45488
41.5	0.887991	0.0925548	0.0327231	0.542394	0.0773783	0.0315896				28.775	9.76952
42.5	0.895726	0.0893262	0.0315816	0.560623	0.0813965	0.03323				28.9587	9.92605
43.5	0.903333	0.0848385	0.0299949	0.58025	0.0828871	0.0338385				29.1412	10.0817
44.5	0.910737	0.0813215	0.0287515	0.601848	0.08658	0.0353461				29.3234	10.2371
45.5	0.919341	0.0773848	0.0273597	0.621312	0.0873516	0.0356612				29.5016	10.3921
46.5	0.928386	0.0743269	0.0262785	0.639427	0.0926491	0.0378238				32.2571	10.5466
47.5	0.935272	0.0697871	0.0246735	0.654642	0.0972308	0.0396943				32.4412	10.7012
48.5	0.939788	0.0680794	0.0240697	0.669793	0.098785	0.0403288				32.6246	11.7827
49.5	0.945631	0.0642147	0.0227033	0.686068	0.0983557	0.0401535				32.8074	11.9384
50.5	0.950273	0.0604821	0.0213836	0.702553	0.100676	0.041101				32.9885	12.0943
51.5	0.952321	0.0590883	0.0208909	0.716974	0.0974549	0.0397858				33.1711	12.251
52.5	0.954378	0.05759	0.0203611	0.733335	0.0969327	0.0395726				33.5536	12.4087
53.5	0.956956	0.0551137	0.0194856	0.746366	0.0970504	0.0396206				33.7555	12.5681
54.5	0.959501	0.0543757	0.0192247	0.75846	0.0971783	0.0396729				33.9637	12.7316
55.5	0.961913	0.0521154	0.0184256	0.76926	0.0947869	0.0386966				34.1742	12.8963
56.5	0.963752	0.0496445	0.017552	0.782007	0.0963724	0.0393439				34.3872	17.2971
57.5	0.967884	0.0444575	0.0157181	0.790907	0.0948931	0.0387399				34.6001	17.4507
58.5	0.968849	0.0429582	0.015188	0.801901	0.0934337	0.0381442				34.814	17.6047
59.5	0.971972	0.039052	0.013807	0.812302	0.0932833	0.0380828				35.0216	17.759
60.5	0.974105	0.0362415	0.0128133	0.82522	0.0892859	0.0364508				35.2304	17.9134
61.5	0.974105	0.0362415	0.0128133	0.836272	0.0892136	0.0364213				35.4395	18.0678
62.5	0.975521	0.0342771	0.0121188	0.847099	0.0855621	0.0349306				38.2574	19.6118
63.5	0.976624	0.0327247	0.0115699	0.856127	0.0823689	0.033627				38.4172	19.7664
64.5	0.978391	0.0303993	0.0107478	0.866658	0.0801486	0.0327205				38.5785	19.9212
65.5	0.980233	0.0276898	0.00978983	0.877423	0.0777902	0.0317577				38.7378	20.0759
66.5	0.981398	0.0255646	0.00903844	0.885118	0.0768609	0.0313783				38.9018	20.2307
67.5	0.984521	0.0210149	0.00742988	0.892394	0.0734553	0.029988				39.9152	20.3856
68.5	0.987578	0.0168906	0.00597173	0.903183	0.06865	0.0280262				40.0799	20.5407
69.5	0.989345	0.0153696	0.00543399	0.911749	0.0640313	0.0261407				40.2436	20.6959
70.5	0.990674	0.0146971	0.00519622	0.921144	0.0616074	0.0251511				40.2436	27.655
71.5	0.992087	0.0122671	0.00433708	0.928843	0.0559768	0.0228524				40.4065	27.8084
72.5	0.99414	0.00881957	0.00311819	0.93514	0.0508453	0.0207575				40.4065	27.9619
73.5	0.995295	0.00692598	0.0024487	0.939925	0.0501586	0.0204771				40.5702	28.1155
74.5	0.996509	0.00514045	0.00181742	0.943822	0.0495856	0.0202433				40.7346	28.2696
75.5	0.997948	0.00369453	0.00130621	0.947715	0.0473745	0.0193405				40.9008	30.2737
76.5	0.999103	0.00173025	0.000611735	0.952846	0.0432917	0.0176738				41.0692	30.428
77.5	0.999787	0.000563405	0.000199194	0.95829	0.0410146	0.0167441				41.2356	30.582
78.5	1	2.35514e-16	8.32667e-17	0.963389	0.0366213	0.0149506				41.5606	30.7361
				0.967294	0.0339978	0.0138795				41.7212	30.8901
				0.97134	0.0293669	0.011989				41.8793	31.0442
				0.973736	0.0274132	0.0111914				42.0381	31.1983
				0.976469	0.0262831	0.01073				42.2029	31.966
				0.979135	0.0258809	0.0105658				42.3701	32.1203
				0.980924	0.0246273	0.0100541				42.5366	32.2751
				0.98294	0.0217972	0.00889865				43.5176	32.4302
				0.98356	0.0215165	0.00878408				43.6814	32.5853
				0.986305	0.0180416	0.00736547				43.8461	32.5853
				0.988427	0.0155649	0.00635436				44.0113	32.7407
				0.99066	0.0135624	0.00553682				44.1764	32.896
				0.99221	0.0111161	0.00453813				44.3397	33.0517
				0.993815	0.00884255	0.00360995				45.5304	33.2074
				0.995056	0.00745142	0.00304203				45.7045	33.3625
				0.995678	0.00671422	0.00274107				46.0651	33.516
				0.996921	0.00566359	0.00231215				46.2492	33.6686
				0.997423	0.00483717	0.00197476				46.4309	33.8219
				0.997486	0.00469825	0.00191805				46.6085	33.9759
				0.998298	0.00380643	0.00155397				46.7845	33.9759
				0.998487	0.0033835	0.00138131				1.55224	34.1305
				0.998676	0.00296056	0.00120864				1.7184	34.2853
				0.998802	0.0026786	0.00109353				2.94638	34.4403
				0.999433	0.00126881	0.00051799				3.6498	34.5956
				0.999685	0.000704895	0.000287772				3.82156	34.7512
				1	3.26841e-16	1.33432e-16				3.99059	38.936
										0	39.0908
Immature SC										5.82828	39.2459
bin center	SC1	SC2	SC3	SC4	SC5	SC6	SC7			5.98596	39.4007
0.5	0.0156617	0.0425894	0.0200965	0.0179558	0.0252708	0.0578512	0.0247718			6.14126	40.0182
1.5	0.0172279	0.0528109	0.028135	0.0359116	0.0397112	0.0640496	0.0273794			6.29601	40.1718
2.5	0.0195771	0.0545145	0.0321543	0.0538674	0.0541516	0.0640496	0.0286832			6.45011	40.3254
3.5	0.0234926	0.0664395	0.0345659	0.0593923	0.0685921	0.072314	0.0352021			6.60428	40.4793
4.5	0.0336727	0.0868825	0.0369775	0.0635359	0.0703971	0.0785124	0.0391134			7.22637	40.6334
5.5	0.0430697	0.112436	0.0442122	0.0883978	0.0758123	0.0950413	0.053455			7.38869	42.3299
6.5	0.0532498	0.122658	0.0530547	0.110497	0.0884477	0.0971074	0.0691004			7.54504	42.4844
7.5	0.0665623	0.153322	0.0562701	0.131215	0.110108	0.107438	0.0821382			7.69782	42.639
8.5	0.0861394	0.172061	0.0586817	0.151934	0.113718	0.113636	0.095176			9.85361	42.7936
9.5	0.111198	0.178876	0.0747588	0.187845	0.131769	0.126033	0.130378			10.0298	42.9481
10.5	0.146437	0.206133	0.0916399	0.208564	0.138989	0.14876	0.161669			10.2102	43.1024
11.5	0.169146	0.224872	0.106913	0.247238	0.166065	0.165289	0.189048			10.3932	43.2567
12.5	0.206735	0.231687	0.131029	0.274862	0.191336	0.190083	0.215124			10.5758	43.2567
13.5	0.238058	0.241908	0.151929	0.312155	0.214801	0.210744	0.276402			10.7581	43.4112
14.5	0.259984	0.25724	0.16881	0.360497	0.234657	0.241736	0.319426			12.6986	43.4112
15.5	0.298356	0.27598	0.195338	0.401934	0.243682	0.28719	0.355932			12.8694	43.5652
16.5	0.331245	0.298126	0.223473	0.430939	0.274368	0.311983	0.387223			13.0345	43.719
17.5	0.364135	0.325383	0.243569	0.476519	0.310469	0.345041	0.432855			13.1968	43.8727
18.5	0.407987	0.359455	0.269293	0.490331	0.32491	0.39876	0.485007			13.3593	44.0264
19.5	0.436962	0.376491	0.291801	0.517956	0.357401	0.421488	0.528031			14.7942	44.1807
20.5	0.4722	0.398637	0.326367	0.559392	0.377256	0.464876	0.550196			14.9648	47.8881
21.5	0.487079	0.429302	0.353698	0.592541	0.379061	0.493802	0.574967			15.1326	48.0427
22.5	0.516053	0.451448	0.386656	0.632597	0.400722	0.533058	0.633638			15.2999	48.197
23.5	0.539546	0.465077	0.411576	0.661602	0.416968	0.572314	0.675359			15.4639	48.3511
24.5	0.570086	0.48552	0.447749	0.685083	0.454874	0.603306	0.713168			17.375	48.5054
25.5	0.588097	0.502555	0.487942	0.729282	0.460289	0.623967	0.753585			17.539	48.6601
26.5	0.61159	0.517888	0.522508	0.773481	0.481949	0.650826	0.771838			17.6969	48.8149
27.5	0.628818	0.53322	0.543408	0.802486	0.516245	0.667355	0.812256			17.8517	49.2822
28.5	0.643696	0.560477	0.557074	0.854972	0.543321	0.692149	0.837027			18.0054	49.4404
29.5	0.683634	0.586031	0.585209	0.888122	0.566787	0.721074	0.868318			18.1629	49.5992
30.5	0.713391	0.606474	0.609325	0.904696	0.583032	0.735537	0.906128			18.3231	49.7577
31.5	0.729052	0.616695	0.631029	0.918508	0.592058	0.760331	0.926988			18.486	49.9155
32.5	0.757244	0.623509	0.654341	0.93232	0.617329	0.774793	0.959583			18.6513	51.937
33.5	0.787001	0.626917	0.678457	0.936464	0.620939	0.789256	0.975228			18.8226	52.0927
34.5	0.819107	0.640545	0.707395	0.946133	0.651625	0.801653	0.977836			18.9954	52.2483
35.5	0.845732	0.65247	0.728296	0.96547	0.684116	0.81405	0.992177			19.3574	52.4036
36.5	0.860611	0.660988	0.755627	0.970994	0.707581	0.832645	0.997392			19.5524	52.5585
37.5	0.874706	0.67121	0.78537	0.972376	0.732852	0.847107	0.998696			19.7522	52.7135
38.5	0.890368	0.681431	0.804662	0.984807	0.745487	0.853306	1			19.956	52.8681
39.5	0.898199	0.70017	0.824759	0.991713	0.752708	0.86157	1			20.1554	53.1774
40.5	0.906813	0.708688	0.838424	0.998619	0.768953	0.876033	1			29.6031	53.332
41.5	0.918559	0.715503	0.853698	1	0.792419	0.886364	1			29.787	53.4867
42.5	0.931872	0.722317	0.869775	1	0.808664	0.88843	1			29.9675	53.6414
43.5	0.939702	0.732538	0.879421	1	0.830325	0.892562	1			30.1454	53.7961
44.5	0.949883	0.74276	0.893891	1	0.84296	0.89876	1			30.3221	53.9509
45.5	0.960846	0.759796	0.911576	1	0.84657	0.909091	1			30.4982	53.9509
46.5	0.971026	0.770017	0.920418	1	0.864621	0.919421	1			32.7627	54.1056
47.5	0.977291	0.785349	0.928457	1	0.880866	0.919421	1			32.9459	54.2602
48.5	0.985121	0.793867	0.937299	1	0.886282	0.919421	1			33.1202	54.4147
49.5	0.994518	0.809199	0.944534	1	0.895307	0.921488	1			33.295	54.5694
50.5	0.996868	0.821124	0.955788	1	0.900722	0.927686	1			33.4744	54.7267
51.5	1	0.827939	0.962219	1	0.900722	0.927686	1			33.6523	54.8857
52.5	1	0.834753	0.971865	1	0.900722	0.927686	1			4.56064	54.8857
53.5	1	0.843271	0.978296	1	0.904332	0.929752	1			4.79728	55.0489
54.5	1	0.844974	0.987138	1	0.907942	0.93595	1			0	55.0489
55.5	1	0.851789	0.98955	1	0.909747	0.944215	1			2.54588	55.2124
56.5	1	0.860307	0.98955	1	0.909747	0.950413	1			2.79513	55.3778
57.5	1	0.875639	0.994373	1	0.920578	0.952479	1			3.03255	55.5437
58.5	1	0.88075	0.995177	1	0.922383	0.952479	1			4.55753	55.7104
59.5	1	0.890971	0.996785	1	0.931408	0.956612	1			4.77092	55.8755
60.5	1	0.899489	0.997588	1	0.935018	0.960744	1			4.9781	56.0402
61.5	1	0.899489	0.997588	1	0.935018	0.960744	1			5.17456	56.2044
62.5	1	0.9046	0.998392	1	0.940433	0.960744	1			5.74388	56.3666
63.5	1	0.908007	0.998392	1	0.945848	0.960744	1			5.9396	56.5281
64.5	1	0.913118	0.998392	1	0.954874	0.960744	1			6.1359	56.6868
65.5	1	0.921635	0.999196	1	0.960289	0.960744	1			6.32871	56.844
66.5	1	0.930153	1	1	0.960289	0.960744	1			7.47673	59.0542
67.5	1	0.943782	1	1	0.967509	0.964876	1			7.66576	59.2208
68.5	1	0.957411	1	1	0.978339	0.964876	1			8.61047	59.3879
69.5	1	0.962521	1	1	0.987365	0.964876	1			8.80806	59.5534
70.5	1	0.965928	1	1	0.994585	0.964876	1			9.02027	59.7201
71.5	1	0.971039	1	1	0.994585	0.971074	1			9.24031	43.8733
72.5	1	0.981261	1	1	0.994585	0.977273	1			9.46532	44.1405
73.5	1	0.986371	1	1	0.994585	0.981405	1			9.92863	44.3552
74.5	1	0.988075	1	1	0.99639	0.987603	1			10.1504	44.5878
75.5	1	0.989779	1	1	1	0.993802	1			10.3593	40.6796
76.5	1	0.994889	1	1	1	0.997934	1			10.5542	40.8376
77.5	1	0.998296	1	1	1	1	1			10.7344	40.9925
78.5	1	1	1	1	1	1	1			10.9078	41.1483
										13.0635	41.1483
										13.2452	41.3064
Adult SC										13.4255	41.4703
bin center	SC1	SC2	SC3	SC4	SC5	SC6				13.609	41.638
0.5	0.00772849	0.0322342	0.0160624	0.0116636	0.00548515	0.0472371				13.7915	41.8043
1.5	0.015457	0.0337162	0.0335016	0.0128913	0.00851144	0.07041				13.9691	33.5574
2.5	0.0211694	0.0337162	0.0445158	0.0141191	0.011916	0.0891266				15.2975	33.7122
3.5	0.0275538	0.0351982	0.0491051	0.0178023	0.014564	0.0980392				15.4591	33.8671
4.5	0.0352823	0.0366803	0.0509408	0.0220994	0.017212	0.102496				15.6175	34.8034
5.5	0.0409946	0.0366803	0.0582836	0.0300798	0.0206166	0.102496				15.7724	34.9663
6.5	0.0443548	0.0366803	0.0637907	0.0362185	0.022508	0.103387				15.9253	35.1308
7.5	0.047379	0.0366803	0.06838	0.0417434	0.0243995	0.105169				16.082	35.2984
8.5	0.0544355	0.0389033	0.0738871	0.0460405	0.0281823	0.107843				16.2422	35.4665
9.5	0.0611559	0.0411263	0.0803121	0.0509515	0.0315869	0.107843				17.375	35.9764
10.5	0.0692204	0.0492775	0.0894906	0.0589319	0.0331001	0.109626				17.5328	36.1448
11.5	0.0742608	0.0618748	0.0968334	0.06814	0.0421789	0.121212				17.6904	36.3142
12.5	0.0833333	0.0670619	0.107848	0.0773481	0.0467184	0.123886				17.8476	36.8407
13.5	0.094422	0.0796591	0.114273	0.0847145	0.0505012	0.128342				18.0064	37.0261
14.5	0.101815	0.0959615	0.124369	0.096992	0.0697938	0.132799				18.1697	37.2287
15.5	0.108871	0.110782	0.136301	0.112953	0.0796293	0.135472				18.3364	37.4464
16.5	0.11828	0.122638	0.148233	0.131983	0.0879516	0.142602				18.505	37.8696
17.5	0.136089	0.135976	0.15833	0.161449	0.097787	0.147059				22.2112	38.0552
18.5	0.15121	0.149315	0.164754	0.184162	0.102326	0.154189				22.3655	38.2255
19.5	0.164987	0.157466	0.175769	0.199509	0.110649	0.16221				22.5135	38.39
20.5	0.181788	0.168581	0.196879	0.210559	0.125024	0.171123				22.6684	34.4756
21.5	0.195901	0.190811	0.214318	0.232658	0.134481	0.181818				22.8328	34.6355
22.5	0.217742	0.195999	0.227168	0.251074	0.148099	0.190731				24.2822	34.8005
23.5	0.232527	0.218229	0.242772	0.267649	0.156421	0.210339				24.4366	31.1055
24.5	0.246304	0.238977	0.262965	0.290362	0.169283	0.223708				24.592	31.2601
25.5	0.259409	0.26269	0.273979	0.313076	0.185928	0.237077				24.7504	31.4148
26.5	0.269825	0.281956	0.292336	0.327808	0.19652	0.254902				24.9121	31.5697
27.5	0.285618	0.301964	0.313447	0.346225	0.209003	0.270053				25.0775	31.7252
28.5	0.297043	0.319748	0.340982	0.365869	0.225648	0.286096				25.2476	29.3459
29.5	0.313172	0.329381	0.362093	0.38981	0.23851	0.304813				25.9208	29.5074
30.5	0.330309	0.337532	0.391464	0.409454	0.250615	0.33066				26.0936	18.4851
31.5	0.355175	0.360504	0.41441	0.423573	0.263476	0.341355				26.2728	18.6802
32.5	0.377016	0.382734	0.435521	0.43585	0.274447	0.361854				26.4558	18.8742
33.5	0.393817	0.40126	0.456631	0.451811	0.286552	0.377005				26.6382	19.0752
34.5	0.410618	0.419785	0.479578	0.467772	0.305466	0.392157				26.8235	19.2814
35.5	0.425067	0.4309	0.502524	0.483118	0.31341	0.418895				27.0094	19.4804
36.5	0.444556	0.450908	0.52547	0.500307	0.327407	0.433155				28.4723	22.1767
37.5	0.472782	0.461282	0.544745	0.523634	0.339512	0.446524				28.6589	22.3335
38.5	0.501344	0.468692	0.567692	0.549417	0.354643	0.470588				28.8474	22.4893
39.5	0.526882	0.483512	0.587884	0.565991	0.367127	0.499109				29.0348	22.6445
40.5	0.543683	0.484994	0.61542	0.595457	0.381124	0.524955				29.2183	22.7993
41.5	0.55746	0.500556	0.635613	0.614487	0.400794	0.545455				31.8802	22.9538
42.5	0.578293	0.514635	0.654888	0.643953	0.414034	0.557932				32.1283	25.4488
43.5	0.598118	0.52575	0.674162	0.664825	0.432192	0.586453				32.3632	25.6129
44.5	0.615591	0.530937	0.698944	0.680172	0.449972	0.635472				32.3632	25.7795
45.5	0.632728	0.552427	0.709959	0.705955	0.465481	0.661319				33.4323	25.9469
46.5	0.648522	0.559096	0.722809	0.729282	0.477208	0.699643				33.6382	26.1221
47.5	0.662298	0.563542	0.737494	0.741559	0.488557	0.734403				33.8398	26.3013
48.5	0.671035	0.581326	0.758605	0.752609	0.500284	0.754902				34.0394	26.5025
49.5	0.691532	0.599111	0.770537	0.756906	0.515793	0.782531				35.2152	26.7098
50.5	0.710349	0.605039	0.791648	0.770411	0.533951	0.803922				35.4076	1.97744
51.5	0.726478	0.627269	0.807251	0.780847	0.549839	0.81016				35.4076	4.64594
52.5	0.741599	0.638385	0.823772	0.798649	0.571402	0.826203				35.5988	4.80146
53.5	0.75504	0.646536	0.835704	0.815838	0.58729	0.83779				35.5988	4.95634
54.5	0.768481	0.653205	0.844883	0.829343	0.602799	0.85205				35.785	5.11184
55.5	0.785954	0.657651	0.854979	0.839779	0.62247	0.854724				35.9668	5.8845
56.5	0.797715	0.665802	0.868747	0.856354	0.635332	0.868093				36.1409	6.03829
57.5	0.802755	0.675435	0.878844	0.86372	0.648572	0.876114				36.3126	6.19233
58.5	0.810484	0.689515	0.895365	0.877225	0.661812	0.877005				37.4981	6.34687
59.5	0.822917	0.697666	0.911886	0.885206	0.674674	0.881462				37.6692	6.50101
60.5	0.83871	0.711745	0.919229	0.888275	0.695858	0.897504				37.8436	9.43467
61.5	0.852487	0.718414	0.929325	0.895028	0.710611	0.911765				8.00749	9.58916
62.5	0.863911	0.73027	0.933915	0.906077	0.729525	0.918895				8.17598	9.74343
63.5	0.880376	0.742868	0.93575	0.914058	0.741252	0.92246				8.34729	9.89804
64.5	0.893817	0.751019	0.942175	0.925721	0.75941	0.927807				8.51595	10.0532
65.5	0.90625	0.763616	0.945847	0.936157	0.774163	0.938503				8.68382	10.9981
66.5	0.916667	0.76658	0.95319	0.94291	0.789294	0.942068				8.84988	11.1579
67.5	0.926075	0.777695	0.955025	0.949048	0.801778	0.944742				9.0177	11.3169
68.5	0.938508	0.792516	0.960532	0.957029	0.822205	0.948307				9.0177	11.474
69.5	0.945901	0.804372	0.96145	0.961326	0.84112	0.956328				9.18827	13.6356
70.5	0.953293	0.814746	0.968793	0.965623	0.857386	0.967023				9.37041	13.7902
71.5	0.958333	0.833272	0.972464	0.966237	0.869491	0.973262				9.56966	13.9448
72.5	0.96203	0.845869	0.972464	0.96992	0.884623	0.975936				9.56966	14.0994
73.5	0.965726	0.851056	0.973382	0.976673	0.891432	0.981283				9.77755	14.254
74.5	0.970766	0.85402	0.977054	0.978514	0.898619	0.983957				9.77755	17.3933
75.5	0.974798	0.859207	0.977972	0.979742	0.908833	0.98574				9.98529	17.5545
76.5	0.978831	0.871804	0.981643	0.979742	0.917534	0.987522				9.98529	17.7153
77.5	0.984207	0.880697	0.983479	0.984039	0.926234	0.991087				10.1949	17.877
78.5	0.986559	0.893294	0.986232	0.984039	0.936448	0.993761				10.1949	18.0398
79.5	0.990927	0.902927	0.988068	0.984039	0.941366	0.996435				10.4031	18.202
80.5	0.993616	0.917006	0.989904	0.984039	0.94704	0.996435				10.4031	18.3639
81.5	0.995296	0.922193	0.991739	0.984039	0.952714	0.996435				10.5967	18.3639
82.5	0.998656	0.926639	0.995411	0.984039	0.957632	0.996435				10.5967	18.5262
83.5	1	0.929604	0.999082	0.986495	0.961415	0.998217				10.7778	18.691
84.5	1	0.933309	0.999082	0.988336	0.964819	1				10.7778	18.8584
85.5	1	0.94146	1	0.988336	0.967846	1				10.9507	19.0248
86.5	1	0.942201	1	0.990178	0.968981	1				10.9507	19.1884
87.5	1	0.952575	1	0.993247	0.972007	1				11.1194	20.8269
88.5	1	0.960726	1	0.996317	0.97352	1				11.2854	20.999
89.5	1	0.966654	1	1	0.977303	1				11.4492	21.1714
90.5	1	0.974064	1	1	0.979194	1				11.6112	21.3435
91.5	1	0.983698	1	1	0.979194	1				11.6112	21.5148
92.5	1	0.989626	1	1	0.980707	1				11.7719	21.685
93.5	1	0.991849	1	1	0.982221	1				11.9319	10.0225
94.5	1	0.997036	1	1	0.98449	1				12.0909	10.2011
95.5	1	0.997777	1	1	0.98676	1				12.2473	10.3607
96.5	1	0.997777	1	1	0.987138	1				12.3989	10.5191
97.5	1	1	1	1	0.989786	1				13.0233	10.676
98.5	1	1	1	1	0.990921	1				13.179	10.8302
99.5	1	1	1	1	0.992056	1				13.3288	10.9846
100.5	1	1	1	1	0.992813	1				13.4759	12.9921
101.5	1	1	1	1	0.996595	1				13.6262	13.1467
102.5	1	1	1	1	0.998109	1				13.7795	13.3014
103.5	1	1	1	1	1	1				14.7203	13.4561
										14.8792	13.6111
										15.0381	13.7666
										15.1947	16.9827
										15.348	17.1516
										15.5021	17.3189
										15.5021	17.4817
										15.6608	17.9531
										15.6608	18.1078
										15.8196	19.9623
										15.9771	20.1171
										16.1357	20.2718
										16.2909	20.4266
										16.4411	20.5814
										16.5873	20.7361
										16.7321	9.88238
										16.8842	10.042
										17.0436	10.2019
										17.2054	10.3592
										17.367	10.5142
										17.5279	10.6688
										17.5279	12.0513
										17.6889	12.2059
										17.8519	12.3606
										18.0184	8.71358
										18.1885	8.88687
										18.3594	9.0558
										18.3594	9.22192
										18.5324	9.38669
										18.5324	12.5266
										18.7074	12.6886
										18.7074	12.8532
										18.8865	13.0183
										19.0676	11.6516
										19.2527	11.8062
										19.2527	11.961
										19.4422	12.1168
										19.4422	12.2732
										19.6388	13.4429
										19.8333	13.5994
										19.8333	13.755
										20.0218	15.4525
										20.0218	15.6088
										20.2169	15.7685
										20.2169	15.9328
										20.4065	16.0993
										21.9061	15.3272
										22.1004	58.3142
										22.2986	58.1537
										22.494	58.3128
										22.6885	59.7196
										22.8761	59.8741
										29.0214	60.0294
										29.1817	60.1851
										29.3407	60.3405
										29.4964	61.2744
										29.6502	61.4314
										29.6502	61.5901
										29.8045	64.0443
										29.8045	64.2069
										29.9594	64.3676
										29.9594	64.528
										30.114	64.688
										30.2672	64.8474
										30.4194	65.0057
										30.574	66.2614
										30.7306	66.4184
										30.8949	66.5786
										31.6001	66.7409
										31.7723	66.9073
										31.9443	67.0776
										32.1166	67.2455
										32.2885	68.5248
										32.4575	68.6887
										32.4575	68.8559
										32.6261	69.0224
										32.6261	69.1863
										32.7941	70.1324
										32.9646	70.2879
										33.1378	70.4428
										33.3103	70.5978
										33.4883	70.7531
										33.6671	75.2368
										34.0107	75.3913
										34.1853	75.5458
										34.3636	75.7005
										35.4057	75.8551
										35.5669	76.0098
										35.729	76.1644
										35.8961	76.9375
										36.0657	76.9375
										36.2377	77.0926
										36.4105	77.0926
										37.2889	77.25
										37.4718	77.25
										37.6542	77.4116
										37.8352	77.4116
										38.0172	77.5821
										38.3734	77.5821
										38.5439	77.7579
										38.7172	77.9324
										38.8968	77.9324
										39.0753	78.1077
										39.2522	78.1077
										39.4237	78.2829
										40.6402	78.2829
										40.8214	61.447
										41.0062	61.6578
										41.1855	61.8107
										41.3572	62.4312
										41.5283	62.59
										43.7048	62.7509
										43.8946	62.9154
										44.0872	63.082
										44.2783	63.2483
										44.4722	63.7478
										44.6659	63.9153
										45.4786	64.0822
										45.6853	64.2487
										45.889	64.4132
										46.0856	64.5778
										3.92569	64.908
										4.11636	65.0726
										4.30537	65.2367
										4.48654	65.3992
										5.42588	60.3832
										5.6138	60.554
										5.80346	60.7248
										5.99107	60.8983
										6.70465	61.0704
										6.87753	61.239
										8.23368	61.5689
										10.1608	61.7331
										10.3367	61.8967
										10.5195	62.0601
										10.7036	62.2243
										11.4545	62.3873
										11.6431	62.3873
										11.8319	62.5498
										12.0177	62.7108
										12.0177	62.8723
										12.2035	63.0335
										12.3869	63.195
										12.5682	65.8717
										12.7497	66.0381
										12.9317	66.2031
										15.3787	66.3662
										15.578	66.5275
										15.7769	66.6877
										15.9723	64.3591
										15.9723	64.5337
										16.1603	64.712
										16.1603	64.8887
										16.3443	65.0683
										16.3443	65.2509
										16.5266	66.2902
										16.7113	66.4606
										16.8938	66.6344
										17.0746	66.8115
										17.2527	66.9862
										18.1524	67.1585
										18.3314	67.3278
										18.5093	68.3231
										18.6874	68.492
										18.8703	68.6596
										19.2517	68.8289
										19.4485	68.9967
										19.6494	0
										19.8572	3.55893
										20.0653	3.71466
										20.277	3.87127
										20.277	4.02768
										20.4893	4.18379
										20.6969	4.34023
										20.8945	4.49635
										21.084	4.49635
										22.1709	4.65246
										22.3513	4.65246
										22.5346	4.80889
										22.7153	4.80889
										22.894	4.96533
										23.0709	4.96533
										23.772	5.12175
										23.9431	5.27815
										24.1142	5.43452
										24.2848	5.59088
										24.4548	5.74732
										24.6238	3.28353
										24.7928	3.43961
										24.9648	3.59581
										25.1449	3.7513
										25.3345	5.14701
										25.5318	5.30183
										25.7355	5.45664
										28.9727	5.61146
										29.126	6.69522
										29.2816	6.84996
										29.4432	7.00471
										29.61	7.15931
										29.7864	7.31398
										32.1768	7.31398
										32.1768	7.46864
										32.4037	7.46864
										32.4037	7.62341
										32.5959	7.77816
										32.5959	7.93307
										32.7877	8.08761
										32.7877	8.24224
										32.977	8.39715
										32.977	8.55292
										33.1594	8.70866
										33.4979	8.86402
										33.6533	9.01915
										33.8039	9.1742
										33.9562	9.32881
										34.1117	9.48339
										34.2715	9.63804
										34.2715	9.79282
										34.432	9.94758
										34.432	10.1023
										34.5957	10.2571
										34.5957	12.8841
										34.7615	13.0388
										34.7615	13.1934
										34.9311	13.348
										35.0993	13.5027
										35.2621	13.6573
										35.2621	13.812
										35.4248	13.9666
										35.5923	16.4427
										35.7572	16.5998
										35.9173	16.7592
										36.0759	16.9222
										36.2331	17.0864
										36.3928	17.2495
										36.8694	17.4102
										37.032	17.5703
										37.1993	17.5703
										37.3587	17.7301
										37.5165	17.889
										37.6863	18.0468
										37.868	18.2041
										38.8549	18.3608
										7.14365	18.5168
										7.30686	19.4474
										7.46951	19.6028
										7.63249	19.7586
										7.79835	19.9147
										7.96377	20.0707
										8.45427	20.2267
										8.61014	20.3821
										8.76319	20.5383
										8.91615	20.6942
										9.06668	21.9351
										9.21439	22.0899
										10.0008	22.0899
										10.1769	22.2447
										10.3573	22.2447
										10.5386	22.4
										10.7221	22.4
										10.9053	22.4
										11.4483	22.5546
										11.6226	22.5546
										11.7956	22.7089
										11.968	22.7089
										12.4752	22.8634
										12.6386	22.8634
										12.798	23.0178
										12.9539	23.0178
										13.1081	23.1722
										13.2616	23.3264
										13.4134	23.3264
										13.5652	23.4809
										14.0406	23.4809
										14.1963	23.6358
										14.3505	23.7912
										14.5053	23.9465
										14.6637	24.1024
										14.8282	24.2585
										14.9964	24.4138
										16.7176	24.5696
										16.8978	25.0459
										17.0788	25.2084
										17.2566	25.3715
										17.4295	25.5353
										17.5978	25.6972
										18.4516	27.6157
										18.6271	27.772
										18.8048	27.929
										18.9825	28.086
										19.1552	28.2429
										19.3247	28.3998
										19.6616	29.0192
										19.827	29.1736
										19.988	29.328
										20.1443	29.4819
										20.2996	29.6359
										20.4595	29.7904
										20.6214	29.9449
										21.3864	30.0995
										21.5335	30.2539
										21.6835	30.409
										21.8399	30.5661
										22	30.7266
										22.1637	30.8901
										22.3277	31.0542
										22.4977	31.0542
										22.6729	31.2178
										22.8525	31.2178
										23.0291	31.382
										23.1958	31.382
										23.3577	31.5468
										23.5145	31.7117
										23.6714	31.8757
										23.828	32.0413
										23.828	32.2059
										23.9824	32.3711
										24.1357	33.6962
										24.291	33.8594
										24.4495	34.0208
										24.6094	34.1795
										24.7683	34.3376
										25.5817	34.4935
										25.7389	35.741
										25.8916	35.8963
										26.0432	36.0532
										26.1925	36.2118
										26.338	36.3698
										26.4813	36.5272
										26.9208	37.6198
										27.0793	37.7748
										27.244	37.9299
										27.4135	38.0859
										27.5873	38.2425
										27.7628	38.3994
										27.9414	38.556
										28.12	38.7131
										29.4411	38.7131
										29.6788	38.8702
										9.95373	39.0288
										9.95373	39.1889
										10.2416	39.3514
										10.2416	39.515
										10.4792	39.6785
										11.7159	39.8438
										11.9334	40.0101
										12.1603	42.2549
										12.3894	42.4097
										12.6178	42.5639
										15.2092	42.7176
										15.4057	42.8715
										15.6027	43.4876
										15.7951	43.6419
										16.3598	43.7959
										16.5468	43.9506
										16.7405	44.1057
										16.938	44.2614
										17.1368	44.42
										17.7654	44.5818
										17.9825	44.7454
										18.1977	46.0088
										18.4067	46.1627
										19.8121	46.3168
										20.0077	46.4709
										20.2066	46.6245
										20.41	46.7781
										23.0493	46.9325
										23.2775	47.0873
										26.5189	47.0873
										26.7499	47.2425
										26.9768	47.2425
										27.1894	47.398
										28.5558	47.5547
										28.753	47.7125
										28.9549	47.8707
										29.1696	48.0281
										29.3962	48.1851
										29.6288	48.3418
										30.8081	49.2904
										31.0477	49.2904
										31.2923	49.4568
										31.5446	49.4568
										31.8118	42.0913
										32.0898	42.2592
										33.3577	42.428
										33.7032	42.5995
										34.0442	42.7732
										34.9532	42.9459
										35.2032	43.2808
										35.4289	43.4462
										35.6395	43.6091
										8.25502	43.7709
										8.43371	43.9301
										8.61272	44.0876
										8.79181	44.4053
										10.7662	44.5653
										10.9322	44.7281
										11.1052	44.8905
										11.2716	45.0547
										11.7316	45.5568
										11.8836	45.7273
										12.0364	45.9027
										12.1944	46.0799
										12.3592	46.2557
										12.3592	36.6222
										12.5322	36.7769
										12.5322	36.9316
										12.7064	37.0863
										12.8819	37.2407
										13.0558	37.3951
										13.2294	37.5495
										13.5735	37.7038
										13.7438	38.1659
										13.9149	38.3194
										14.0841	38.4738
										14.2548	38.6295
										14.2548	38.7887
										14.4254	38.9519
										14.5955	39.1177
										14.7658	39.2835
										14.9321	16.8573
										15.0961	17.0412
										15.2597	17.2045
										15.4279	17.365
										15.5989	17.5254
										15.7701	17.6838
										16.2912	17.8426
										16.4682	17.9999
										16.6491	18.1571
										16.8349	18.3134
										17.0288	18.4696
										18.2697	18.9439
										18.5069	19.1064
										18.7534	19.2721
										19.0098	19.4407
										19.2735	19.4407
										19.2735	19.6079
										19.5411	19.6079
										19.8121	19.7737
										20.0804	21.7384
										20.3427	21.9062
										12.3198	22.0756
										12.4745	22.2474
										12.645	22.4163
										12.8115	22.5842
										13.6217	22.7509
										13.7765	23.86
										13.9307	24.0146
										14.0904	24.1691
										15.1964	24.3237
										15.348	24.4789
										15.496	24.6349
										15.6502	28.3044
										16.7765	28.459
										16.9211	28.6136
										17.0681	28.7683
										17.2221	28.9229
										17.3812	29.0775
										17.5402	29.2321
										17.6986	29.3868
										17.8554	29.6958
										18.0107	29.8503
										18.1646	30.0048
										18.32	30.1592
										18.32	30.3134
										18.4809	30.4677
										18.6468	30.6223
										18.8152	30.7769
										18.9825	30.7769
										19.1455	30.9315
										19.3	30.9315
										19.5914	31.0861
										19.7405	31.2407
										19.8954	31.3953
										20.0545	31.55
										20.2161	31.7047
										20.3786	31.8594
										23.7416	31.8594
										23.9316	32.015
										24.119	32.015
										24.3115	32.1726
										24.5062	32.3368
										24.6958	32.5086
										24.8749	32.682
										25.538	32.8531
										25.7019	33.0229
										25.8591	34.0566
										26.0088	34.2293
										26.1583	34.4013
										26.3128	34.5719
										26.4766	34.7404
										27.4759	34.9075
										27.6352	35.0719
										27.7927	42.181
										27.9425	42.3357
										28.0952	42.4893
										28.2613	42.6423
										29.2999	42.7958
										29.4658	42.9495
										29.6283	43.1035
										29.7894	44.4895
										29.9552	44.6425
										30.1254	44.7954
										30.2974	44.9494
										34.0571	45.1049
										34.2355	45.2614
										34.4096	47.2925
										34.5751	47.4986
										34.7338	47.7071
										35.3512	44.7962
										35.5039	45.0001
										35.6564	45.154
										35.8085	45.3075
										35.9639	45.3075
										36.1198	45.4613
										36.2744	45.4613
										38.5517	45.6153
										38.731	45.6153
										38.9073	45.7698
										39.0849	45.9244
										40.932	46.079
										41.2016	39.9352
										41.4922	40.0889
										41.8003	40.3986
										4.18324	40.5542
										4.36314	40.7118
										4.5488	40.873
										4.73317	41.0354
										10.7275	41.199
										10.9272	41.3638
										11.2309	41.5272
										11.4501	36.5033
										11.6332	36.6633
										11.814	36.8222
										15.7812	36.9813
										15.9488	37.139
										16.1239	37.2977
										16.3028	37.2977
										16.4831	37.4558
										16.6593	37.4558
										16.83	37.6156
										18.0223	37.7768
										18.1856	37.9391
										18.3448	38.1033
										18.5052	32.1048
										18.6689	32.3385
										18.834	32.492
										18.997	32.6455
										19.1605	32.8001
										19.6483	32.9547
										19.8115	33.1092
										19.9787	33.2633
										20.1515	33.4177
										20.3305	21.7713
										20.3305	21.9511
										20.5119	22.1381
										20.5119	22.3237
										20.6925	22.5077
										20.6925	22.6959
										20.8749	22.887
										21.0608	23.0849
										21.2497	23.2902
										21.435	23.5064
										21.6146	23.7342
										22.1339	23.9585
										22.3135	24.1794
										22.5002	24.3992
										22.6861	24.6206
										22.8684	22.5065
										23.0482	22.6608
										23.2292	22.8246
										23.2292	38.7909
										23.4132	39.0151
										23.6003	40.6274
										23.7908	40.7924
										23.9798	40.9566
										24.1669	39.3173
										24.7443	39.539
										24.9326	39.6983
										25.1209	39.8602
										25.3069	40.0233
										25.4975	40.187
										26.2614	40.3544
										26.4449	40.5225
										26.6286	40.0321
										26.8133	40.3331
										26.998	46.4502
										27.188	46.6043
										27.3747	46.7591
										29.7909	48.762
										29.9709	48.9163
										30.1525	49.0706
										30.336	49.2249
										30.5181	49.3794
										30.7007	49.9978
										30.8857	50.1523
										32.9536	50.3069
										33.1574	50.4614
										33.3666	50.7705
										33.5808	50.9254
										33.794	51.0804
										10.2883	51.2381
										11.7294	51.3989
										11.8976	51.5609
										12.0609	53.7786
										12.222	53.9347
										13.1528	54.0907
										13.353	54.2464
										13.5498	56.4161
										46.7663	56.5813
										46.9135	56.7515
										47.0797	56.9233
										48.9218	57.0957
										49.1084	50.2521
										49.3	50.4287
										39.1287	50.5832
										39.3451	50.8901
										39.527	51.043
										39.6984	51.1968
										39.8621	51.6588
										41.8177	51.8121
										41.9824	51.9656
										42.1494	52.1189
										42.3217	52.2735
										42.5073	51.1545
										42.6969	51.484
										42.6969	51.638
										42.8919	51.7928
										42.8919	51.9474
										43.0875	52.1025
										43.2828	49.3161
										43.473	49.5603
										43.6568	49.7268
										43.8365	52.2141
										44.3535	52.5103
										44.5215	53.5913
										44.6949	53.7958
										44.8714	54.0001
										45.0508	54.1937
										45.2309	49.552
										45.4083	49.552
										45.5813	49.7275
										45.75	49.8906
										45.9121	50.0515
										46.0707	50.2122
										46.2262	50.3726
										46.3818	50.5339
										46.5413	50.6947
										46.7043	50.8591
										47.5074	51.0243
										47.6683	51.1909
										47.8293	51.3565
										47.9904	51.5211
										48.1508	51.6854
										48.3094	52.7969
										48.7788	52.9525
										48.9309	53.1082
										49.0836	55.4356
										49.2382	55.59
										49.3939	55.7443
										49.551	55.8986
										49.7097	56.0527
										49.7097	56.2066
										49.8701	56.3612
										50.0315	56.5169
										50.1953	56.6746
										50.3624	59.8696
										51.4005	60.0548
										51.581	60.2381
										51.7653	60.4171
										51.9548	60.5934
										30.6386	60.7676
										30.8375	60.9382
										31.0111	61.1059
										31.1896	61.2717
										33.0941	61.4367
										8.25262	61.6017
										8.41909	61.7658
										8.58804	61.9289
										8.75765	62.0905
										8.92864	62.2497
										10.5938	62.8791
										10.7862	63.0376
										10.9772	63.198
										11.1708	63.3614
										12.5121	63.53
										12.706	63.7003
										12.9023	63.8706
										13.1011	64.0404
										15.4343	64.7002
										15.6499	64.8632
										15.8606	65.0268
										16.0593	65.1923
										16.5844	65.3588
										16.7548	65.5272
										16.928	65.6969
										17.1072	65.8675
										17.2927	67.408
										17.6755	67.6052
										17.862	67.8075
										18.0343	67.9987
										18.2044	68.1762
										20.0121	68.3468
										20.1905	68.3468
										20.3704	68.5124
										20.5527	68.6746
										20.7351	68.8336
										21.85	68.9908
										22.05	69.1467
										22.2411	69.3024
										22.4226	49.2943
										23.4523	49.2943
										23.6117	49.4581
										23.9281	49.4581
										24.0889	49.4581
										24.2478	49.6234
										24.4005	49.787
										24.549	49.949
										25.5188	50.1092
										25.6801	50.2696
										25.8342	50.4301
										25.9867	50.5926
										26.14	50.7545
										26.2958	50.9197
										27.5594	51.0884
										27.7172	51.2543
										27.8773	51.4187
										28.0368	51.5828
										28.1958	52.695
										29.2939	52.8507
										29.4543	53.0064
										29.6137	55.3333
										29.7734	55.4878
										29.9344	55.642
										30.096	55.7963
										30.4198	55.9502
										30.5815	56.1041
										30.7455	56.2586
										30.9074	56.4138
										31.0658	56.5715
										31.2229	56.7325
										31.3764	59.7654
										32.9346	59.9468
										33.0888	60.1303
										33.244	60.3107
										33.4009	60.4886
										33.5574	60.6638
										33.7103	60.8343
										33.8575	61.002
										34.0011	61.1684
										34.1496	61.3343
										34.1496	61.4994
										34.3021	61.664
										34.4558	61.8277
										34.61	61.9892
										34.7649	62.1484
										34.9183	62.9358
										35.0713	63.0957
										35.2235	63.26
										36.3186	63.4277
										36.4867	63.599
										25.8913	63.7693
										27.1808	63.939
										27.3834	64.5993
										27.5854	64.763
										27.7881	64.9273
										27.7881	65.092
										14.0818	65.2586
										14.767	65.427
										14.9953	65.5957
										17.4959	65.7672
										17.6971	67.3052
										17.8917	67.5004
										18.4395	67.6993
										18.6184	67.8868
										18.7939	68.064
										18.9685	68.2337
										20.7231	68.2337
										20.9097	68.4001
										21.1	68.5623
										21.2914	68.7212
										21.4854	68.8785
										21.6788	69.0342
										21.8742	69.1894
										22.0736	73.0288
										22.8702	73.2161
										23.0723	73.4013
										26.8812	73.5868
										28.5051	68.856
										28.687	69.0227
										28.8739	69.1902
										30.2318	69.3622
										30.4373	65.5796
										30.6108	65.7375
										30.7844	65.899
										31.9994	66.0642
										32.1824	66.5737
										32.374	66.7464
										20.268	66.92
										20.268	67.0928
										20.4726	69.6347
										20.6583	69.8065
										20.8338	69.9808
										20.9978	70.1558
										22.6396	60.0027
										22.8037	60.3343
										22.9665	60.554
										23.1278	62.8051
										23.653	62.9697
										23.8635	63.1343
										23.8635	63.3004
										24.0726	54.7933
										24.0726	54.9477
										24.2793	55.1032
										24.4892	55.2592
										25.9873	55.4168
										26.1736	55.5759
										26.3579	51.1554
										26.5433	51.4725
										26.7227	51.6778
										28.8815	51.884
										29.0888	52.8523
										29.3048	53.0414
										29.5265	53.2238
										29.7533	53.4011
										29.9742	67.4371
										30.1884	67.6485
										30.3983	67.8802
										30.606	68.117
										30.8136	68.3509
										31.6115	68.5769
										31.814	69.6343
										12.2428	69.8369
										12.4133	70.0537
										12.578	70.2861
										14.9185	57.4536
										16.1364	57.7021
										16.3027	57.8577
										16.4725	58.0138
										16.6454	58.1696
										16.8195	58.9739
										16.9903	59.139
										18.9786	59.3049
										19.1619	59.4707
										5.40883	59.6385
										5.58167	49.3289
										5.7494	49.5592
										6.23201	49.7225
										6.38697	49.8872
										8.80754	50.05
										8.97049	50.2108
										9.13233	52.4992
										9.29464	52.6712
										9.45835	52.8427
										10.1158	53.0123
										10.2782	53.1794
										10.44	53.3472
										10.6013	53.5124
										11.731	54.637
										11.8995	54.7959
										12.0727	54.9552
										12.2472	55.1146
										12.425	55.2735
										12.7757	55.4325
										12.9489	55.5903
										13.1214	56.0602
										13.2958	56.2171
										14.0394	56.3743
										14.2314	56.5314
										14.4177	56.6892
										13.1226	56.8468
										13.2856	57.004
										13.4526	57.3157
										13.6191	57.4716
										15.3764	57.6274
										15.5575	57.7828
										15.7374	57.9386
										14.6224	58.0948
										14.8339	58.2521
										15.0364	58.4105
										15.2313	58.5694
										6.54954	58.7271
										6.71635	58.8835
										6.88076	59.0393
										7.691	59.0393
										7.85603	59.1942
										9.53381	59.1942
										9.73787	59.3489
										9.60099	59.5034
										9.76927	59.6571
										29.932	59.8098
										30.2096	59.9627
										38.6416	63.0528
										38.4487	63.2069
										37.1388	63.3611
										33.9893	63.5157
										34.1685	63.6701
										34.9982	63.8246
										35.1938	63.9793
										35.3885	66.1384
										35.5837	66.2938
										29.2291	66.4502
										29.3855	66.6093
										29.5442	67.4104
										29.7047	67.5688
										29.8615	67.7274
										30.016	67.8865
										30.1704	68.0473
										30.3284	68.2079
										30.8175	68.3687
										30.9894	69.637
										31.1695	69.7946
										31.3591	69.9527
										31.5462	70.1101
										31.7271	70.2675
										32.5888	70.4247
										32.7663	71.4154
										32.9473	71.4154
										33.1321	71.5912
										33.3175	71.5912
										33.6915	71.7733
										33.8726	71.7733
										34.0486	71.9576
										34.2211	72.1353
										34.3872	72.3056
										34.5426	72.4727
										34.6879	75.8269
										34.8281	75.9815
										36.1298	76.1362
										36.2861	76.2911
										36.4396	76.4474
										36.5938	76.6061
										36.7509	76.7712
										36.9063	73.9776
										37.0571	74.1864
										37.6689	74.3421
										37.8327	74.497
										37.9952	74.497
										38.1622	74.6515
										38.3349	74.6515
										38.5017	74.806
										38.6585	74.806
										41.9959	74.961
										42.1514	75.1166
										42.3055	75.2727
										42.4603	71.7462
										42.6157	71.9575
										42.7699	72.1248
										42.9236	72.2894
										44.7411	72.2894
										44.9108	72.4512
										45.0765	72.4512
										45.2422	72.6125
										45.412	72.7742
										47.504	72.934
										47.6696	73.0928
										47.8439	73.2513
										48.0253	73.4077
										48.2068	73.7175
										48.3924	73.8717
										48.5948	74.0265
										48.8188	74.183
										49.0527	74.342
										49.2874	74.5057
										49.5449	74.6717
										26.8679	74.8413
										24.7092	75.0151
										25.9626	75.6996
										0	75.8708
										0.168294	76.0447
										4.46077	76.2233
										7.66747	76.4092
										7.82604	77.2432
										7.98353	77.48
										8.14061	77.7172
										9.07391	77.9625
										9.23425	79.7518
										9.39395	79.9416
										9.55429	80.14
										9.7204	82.7459
										9.89295	82.9744
										12.0143	83.1826
										12.195	83.3659
										12.3716	83.5367
										12.5515	83.7038
										13.4172	58.7597
										13.5799	58.9325
										13.7439	59.1121
										15.2546	59.3045
										15.4296	59.5045
										15.6046	60.2549
										15.7825	60.4268
										17.3748	60.5957
										17.5551	60.763
										17.7341	60.9271
										17.9121	61.0892
										21.552	62.6989
										21.7275	62.8661
										21.9072	63.0329
										22.0902	63.0329
										22.272	63.2
										22.4542	63.3673
										24.0559	63.5353
										24.2185	63.7022
										24.3856	65.2143
										24.5604	65.3918
										24.7415	65.5691
										24.9198	65.7448
										28.5991	52.9605
										28.775	53.1498
										28.9587	53.3098
										29.1412	54.9043
										29.3234	55.0801
										29.5016	55.2634
										32.2571	55.4596
										32.4412	55.6644
										32.6246	55.87
										32.8074	54.0747
										32.9885	54.2958
										33.1711	54.5425
										33.5536	54.812
										33.7555	54.812
										33.9637	55.095
										34.1742	55.3722
										34.3872	55.6354
										34.6001	53.7404
										34.814	53.9593
										35.0216	59.5718
										35.2304	59.7511
										35.4395	59.9303
										38.2574	60.1182
										38.4172	60.3023
										38.5785	63.6316
										38.7378	63.795
										38.9018	63.9576
										39.9152	64.1181
										40.0799	68.5597
										40.2436	68.7356
										40.2436	68.9072
										40.4065	69.078
										40.4065	70.0865
										40.5702	64.0436
										40.7346	64.5837
										40.9008	64.7407
										41.0692	64.897
										41.2356	66.9862
										41.5606	67.1637
										41.7212	67.3417
										41.8793	67.5216
										42.0381	67.7011
										42.2029	67.8805
										42.3701	68.2282
										42.5366	68.3966
										43.5176	68.5638
										43.6814	68.7301
										43.8461	68.8959
										44.0113	69.0586
										44.1764	69.5348
										44.3397	69.6919
										45.5304	69.8483
										45.7045	70.0047
										46.0651	70.1606
										46.2492	70.1606
										46.4309	70.3164
										46.6085	70.3164
										46.7845	70.4734
										1.55224	70.4734
										1.7184	70.6306
										2.94638	70.789
										3.6498	70.9501
										3.82156	71.1131
										3.99059	71.1131
										0	71.2797
										5.82828	71.4502
										5.98596	71.6259
										6.14126	71.8056
										6.29601	58.1288
										6.45011	58.3842
										6.60428	60.3958
										7.22637	60.5759
										7.38869	60.7631
										7.54504	60.9471
										7.69782	61.1224
										9.85361	73.4554
										10.0298	77.9586
										10.2102	78.1247
										10.3932	78.2888
										10.5758	78.4522
										10.7581	79.0867
										12.6986	79.2441
										12.8694	79.4013
										13.0345	79.5584
										13.1968	79.7156
										13.3593	79.8722
										14.7942	79.8722
										14.9648	80.0278
										15.1326	80.0278
										15.2999	80.1827
										15.4639	80.337
										17.375	80.4912
										17.539	80.6457
										17.6969	80.8001
										17.8517	81.746
										18.0054	81.9095
										18.1629	82.076
										18.3231	82.2443
										18.486	82.4133
										18.6513	59.3316
										18.8226	59.5264
										18.9954	59.6833
										19.3574	59.8406
										19.5524	60.7739
										19.7522	60.9289
										19.956	61.0838
										20.1554	61.2387
										29.6031	61.3938
										29.787	61.552
										29.9675	61.7165
										30.1454	62.4139
										30.3221	62.5898
										30.4982	62.7641
										32.7627	62.9368
										32.9459	63.1086
										33.1202	63.2814
										33.295	63.455
										33.4744	63.6274
										33.6523	63.8018
										4.56064	63.9761
										4.79728	64.1486
										0	64.3198
										2.54588	64.4896
										2.79513	64.6585
										3.03255	65.5139
										4.55753	65.6967
										4.77092	65.8886
										4.9781	66.0952
										5.17456	66.3077
										5.74388	22.1636
										5.9396	22.3313
										6.1359	22.4861
										6.32871	22.6407
										7.47673	22.7954
										7.66576	22.9495
										8.61047	23.1035
										8.80806	23.2577
										9.02027	24.3457
										9.24031	24.5063
										9.46532	24.6693
										9.92863	24.8346
										10.1504	25.0017
										10.3593	25.1703
										10.5542	25.3387
										10.7344	25.5071
										10.9078	25.6771
										13.0635	25.8474
										13.2452	26.0183
										13.4255	26.191
										13.609	26.3642
										13.7915	27.0871
										13.9691	27.2747
										15.2975	27.4671
										15.4591	27.6578
										15.6175	27.8433
										15.7724	29.9907
										15.9253	30.1657
										16.082	30.3451
										16.2422	30.3451
										17.375	30.525
										17.5328	30.525
										17.6904	30.706
										17.8476	30.706
										18.0064	30.8848
										18.1697	31.0599
										18.3364	31.9367
										18.505	32.1169
										22.2112	32.2937
										22.3655	32.4661
										22.5135	32.6347
										22.6684	32.8015
										22.8328	35.4645
										24.2822	35.6522
										24.4366	35.8366
										24.592	36.016
										24.7504	36.1918
										24.9121	36.365
										25.0775	36.5368
										25.2476	31.0245
										25.9208	31.1847
										26.0936	31.3495
										26.2728	31.5142
										26.4558	10.693
										26.6382	10.8476
										26.8235	11.0023
										27.0094	11.157
										28.4723	14.4691
										28.6589	14.6243
										28.8474	14.779
										29.0348	14.9337
										29.2183	15.0883
										31.8802	15.2416
										32.1283	16.1706
										32.3632	16.3255
										32.3632	16.4801
										33.4323	16.6344
										33.6382	16.7886
										33.8398	16.9427
										34.0394	19.5585
										35.2152	19.7131
										35.4076	19.7131
										35.4076	19.8677
										35.5988	19.8677
										35.5988	20.0224
										35.785	20.0224
										35.9668	20.1761
										36.1409	20.1761
										36.3126	20.3291
										37.4981	20.4828
										37.6692	20.6371
										37.8436	20.7917
										8.00749	20.946
										8.17598	20.946
										8.34729	21.1004
										8.51595	21.1004
										8.68382	21.2549
										8.84988	21.2549
										9.0177	21.4094
										9.0177	21.5637
										9.18827	21.7181
										9.37041	21.8724
										9.56966	22.0268
										9.56966	22.181
										9.77755	22.3353
										9.77755	22.955
										9.98529	23.1116
										9.98529	23.2691
										10.1949	23.427
										10.1949	23.5846
										10.4031	23.7413
										10.4031	23.8984
										10.5967	24.0539
										10.5967	24.208
										10.7778	24.8298
										10.7778	24.8298
										10.9507	24.9837
										10.9507	24.9837
										11.1194	25.1379
										11.2854	25.1379
										11.4492	25.2919
										11.6112	25.2919
										11.6112	25.4461
										11.7719	25.4461
										11.9319	26.5247
										12.0909	26.6782
										12.2473	26.8313
										12.3989	26.9849
										13.0233	27.1392
										13.179	27.2936
										13.3288	27.4481
										13.4759	27.6029
										13.6262	30.5391
										13.7795	30.6926
										14.7203	30.8461
										14.8792	31.0003
										15.0381	31.1546
										15.1947	31.1546
										15.348	31.309
										15.5021	31.309
										15.5021	31.4643
										15.6608	31.4643
										15.6608	31.6213
										15.8196	31.7807
										15.9771	31.9414
										16.1357	32.1029
										16.2909	32.2644
										16.4411	32.4256
										16.5873	32.9171
										16.7321	33.0829
										16.8842	33.252
										17.0436	33.4238
										17.2054	33.5996
										17.367	33.7787
										17.5279	33.9628
										17.5279	36.089
										17.6889	36.2666
										17.8519	36.4485
										18.0184	36.6274
										18.1885	36.8003
										18.3594	36.9702
										18.3594	37.1383
										18.5324	37.7928
										18.5324	37.9529
										18.7074	38.1123
										18.7074	38.2726
										18.8865	38.7557
										19.0676	38.9194
										19.2527	39.0824
										19.2527	39.2456
										19.4422	39.4086
										19.4422	39.5711
										19.6388	39.7321
										19.8333	41.6767
										19.8333	41.8491
										20.0218	42.023
										20.0218	42.2004
										20.2169	43.6539
										20.2169	43.8301
										20.4065	44.004
										21.9061	44.1807
										22.1004	44.359
										22.2986	44.54
										22.494	33.1272
										22.6885	33.3354
										22.8761	33.4898
										29.0214	33.6445
										29.1817	33.7995
										29.3407	33.955
										29.4964	34.1104
										29.6502	35.1955
										29.6502	35.3501
										29.8045	35.5045
										29.8045	35.6585
										29.9594	35.8132
										29.9594	35.9679
										30.114	36.1227
										30.2672	36.5874
										30.4194	36.7424
										30.574	36.8973
										30.7306	37.0524
										30.8949	37.2073
										31.6001	37.5171
										31.7723	37.6721
										31.9443	37.8274
										32.1166	37.9824
										32.2885	38.1372
										32.4575	38.2926
										32.4575	38.2926
										32.6261	38.4476
										32.6261	38.4476
										32.7941	38.6029
										32.9646	38.6029
										33.1378	38.7583
										33.3103	38.9142
										33.4883	39.0703
										33.6671	39.2265
										34.0107	39.3822
										34.1853	41.8543
										34.3636	42.0083
										35.4057	42.1623
										35.5669	42.3163
										35.729	42.4705
										35.8961	43.7089
										36.0657	43.8698
										36.2377	44.0372
										36.4105	44.2091
										37.2889	49.3733
										37.4718	49.5444
										37.6542	49.7141
										37.8352	49.8841
										38.0172	50.0511
										38.3734	50.2169
										38.5439	50.3831
										38.7172	50.5465
										38.8968	51.0294
										39.0753	51.1882
										39.2522	51.8139
										39.4237	51.9678
										40.6402	52.1215
										40.8214	52.2757
										41.0062	52.4303
										41.1855	52.5849
										41.3572	54.7685
										41.5283	54.9375
										43.7048	55.1105
										43.8946	55.2838
										44.0872	55.4599
										44.2783	55.6416
										44.4722	47.4149
										44.6659	47.7341
										45.4786	47.9433
										45.6853	48.1453
										45.889	48.3476
										46.0856	50.3112
										3.92569	4.17249
										4.11636	4.42453
										4.30537	4.58919
										4.48654	4.7545
										5.42588	4.92058
										5.6138	5.08579
										5.80346	5.25256
										5.99107	0
										6.70465	0.160393
										6.87753	0.319842
										8.23368	1.27906
										10.1608	3.31728
										10.3367	3.47513
										10.5195	6.30927
										10.7036	6.46638
										11.4545	6.62295
										11.6431	6.77892
										11.8319	8.18089
										12.0177	8.33965
										12.0177	8.49895
										12.2035	10.2352
										12.3869	12.7257
										12.5682	12.8807
										12.7497	13.0354
										12.9317	13.19
										15.3787	13.3443
										15.578	13.4985
										15.7769	13.4985
										15.9723	13.6531
										15.9723	13.8077
										16.1603	13.9623
										16.1603	14.1169
										16.3443	14.2716
										16.3443	14.4262
										16.5266	15.8181
										16.7113	15.9731
										16.8938	16.1283
										17.0746	16.2837
										17.2527	16.4392
										18.1524	16.595
										18.3314	16.7505
										18.5093	17.2169
										18.6874	17.3723
										18.8703	17.5274
										19.2517	17.6825
										19.4485	17.8372
										19.6494	17.9918
										19.8572	18.1463
										20.0653	18.4558
										20.277	18.6107
										20.277	18.7654
										20.4893	18.9206
										20.6969	19.0754
										20.8945	19.2312
										21.084	19.3881
										22.1709	19.5462
										22.3513	19.7052
										22.5346	19.8642
										22.7153	19.8642
										22.894	20.0223
										23.0709	20.0223
										23.772	20.1802
										23.9431	20.3382
										24.1142	20.4967
										24.2848	20.6555
										24.4548	20.8156
										24.6238	20.8156
										24.7928	20.9752
										24.9648	20.9752
										25.1449	21.1353
										25.3345	21.2951
										25.5318	21.2951
										25.7355	21.4553
										28.9727	21.4553
										29.126	21.617
										29.2816	21.617
										29.4432	21.7754
										29.61	21.7754
										29.7864	21.934
										32.1768	22.0916
										32.1768	22.2482
										32.4037	22.4052
										32.4037	25.1994
										32.5959	25.3545
										32.5959	25.5094
										32.7877	25.6645
										32.7877	25.8196
										32.977	25.9745
										32.977	26.1297
										33.1594	26.2849
										33.4979	26.44
										33.6533	26.44
										33.8039	26.5957
										33.9562	26.7512
										34.1117	26.9067
										34.2715	27.0623
										34.2715	27.2175
										34.432	27.373
										34.432	27.5287
										34.5957	27.6851
										34.5957	27.8428
										34.7615	28.3273
										34.7615	28.4928
										34.9311	28.656
										35.0993	28.8164
										35.2621	28.976
										35.2621	29.1354
										35.4248	29.2928
										35.5923	29.2928
										35.7572	29.4486
										35.9173	29.6048
										36.0759	29.7605
										36.2331	29.916
										36.3928	30.0719
										36.8694	30.3854
										37.032	30.5455
										37.1993	30.7075
										37.3587	30.8699
										37.5165	31.561
										37.6863	31.7632
										37.868	31.9863
										38.8549	32.2262
										7.14365	32.473
										7.30686	36.2462
										7.46951	36.4507
										7.63249	36.6504
										7.79835	36.8432
										7.96377	37.0236
										8.45427	37.1985
										8.61014	37.3717
										8.76319	37.5461
										8.91615	37.5461
										9.06668	37.7186
										9.21439	37.8905
										10.0008	38.0618
										10.1769	38.2315
										10.3573	38.2315
										10.5386	38.4023
										10.7221	38.4023
										10.9053	38.5698
										11.4483	38.7384
										11.6226	38.9055
										11.7956	39.0733
										11.968	39.2401
										12.4752	39.4065
										12.6386	47.0444
										12.798	47.24
										12.9539	47.4287
										13.1081	47.6081
										13.2616	47.7842
										13.4134	47.9572
										13.5652	49.0725
										14.0406	49.2686
										14.1963	49.4551
										14.3505	49.6347
										14.5053	49.8071
										14.6637	49.9762
										14.8282	50.1462
										14.9964	50.3145
										16.7176	49.8356
										16.8978	50.0741
										17.0788	50.2489
										17.2566	45.0464
										17.4295	36.8373
										17.5978	37.0576
										18.4516	37.2167
										18.6271	37.3757
										18.8048	38.5952
										18.9825	38.5952
										19.1552	38.7868
										19.3247	38.7868
										19.6616	38.944
										19.827	38.944
										19.988	38.944
										20.1443	39.1025
										20.2996	39.1025
										20.4595	39.1025
										20.6214	39.2626
										21.3864	39.2626
										21.5335	39.4255
										21.6835	39.4255
										21.8399	39.591
										22	39.591
										22.1637	39.7573
										22.3277	39.9211
										22.4977	42.7381
										22.6729	42.8954
										22.8525	43.0524
										23.0291	43.2085
										23.1958	43.3664
										23.3577	43.5241
										23.5145	43.6817
										23.6714	43.8384
										23.828	43.8384
										23.828	43.9944
										23.9824	43.9944
										24.1357	44.1497
										24.291	44.3043
										24.4495	46.7767
										24.6094	46.9313
										24.7683	47.086
										25.5817	47.2408
										25.7389	47.3959
										25.8916	47.552
										26.0432	49.84
										26.1925	50.0008
										26.338	50.1648
										26.4813	50.329
										26.9208	50.4925
										27.0793	50.6536
										27.244	50.8137
										27.4135	52.0925
										27.5873	52.2513
										27.7628	52.4081
										27.9414	52.5643
										28.12	52.7204
										29.4411	52.8779
										29.6788	53.0349
										9.95373	54.58
										9.95373	54.7356
										10.2416	54.8914
										10.2416	55.0473
										10.4792	55.2065
										11.7159	55.3656
										11.9334	55.5229
										12.1603	55.6787
										12.3894	60.0179
										12.6178	61.6872
										15.2092	61.8584
										15.4057	62.0259
										15.6027	62.1905
										15.7951	62.3519
										16.3598	62.5123
										16.5468	64.266
										16.7405	64.438
										16.938	64.6119
										17.1368	64.79
										17.7654	64.969
										17.9825	65.1521
										18.1977	65.1521
										18.4067	65.3379
										19.8121	65.3379
										20.0077	65.5295
										20.2066	65.7275
										20.41	65.9237
										23.0493	66.1109
										23.2775	66.2936
										26.5189	66.4753
										26.7499	66.6481
										26.9768	81.6166
										27.1894	81.7707
										28.5558	81.9247
										28.753	82.0792
										28.9549	82.2338
										29.1696	82.3871
										29.3962	82.5399
										29.6288	82.8494
										30.8081	79.176
										31.0477	79.3419
										31.2923	79.5084
										31.5446	79.6742
										31.8118	31.9835
										32.0898	32.1831
										33.3577	32.3392
										33.7032	32.4952
										34.0442	32.6512
										34.9532	34.6629
										35.2032	34.8175
										35.4289	34.9721
										35.6395	34.9721
										8.25502	35.1267
										8.43371	35.2813
										8.61272	35.4358
										8.79181	35.5903
										10.7662	35.7449
										10.9322	35.8995
										11.1052	36.0542
										11.2716	40.9887
										11.7316	41.1437
										11.8836	41.2984
										12.0364	41.4536
										12.1944	41.6088
										12.3592	41.7646
										12.3592	41.9211
										12.5322	42.5389
										12.5322	42.6946
										12.7064	42.8515
										12.8819	43.0079
										13.0558	43.1635
										13.2294	43.3195
										13.5735	44.4207
										13.7438	44.5786
										13.9149	44.7369
										14.0841	44.8949
										14.2548	45.0536
										14.2548	45.2128
										14.4254	45.2128
										14.5955	45.3726
										14.7658	45.5318
										14.9321	45.6915
										15.0961	45.851
										15.2597	46.012
										15.4279	46.1741
										15.5989	46.3338
										15.7701	46.4929
										16.2912	46.6493
										16.4682	46.8051
										16.6491	46.9615
										16.8349	47.1196
										17.0288	47.2784
										18.2697	47.2784
										18.5069	47.4372
										18.7534	47.4372
										19.0098	47.5947
										19.2735	47.7521
										19.2735	42.7863
										19.5411	42.9669
										19.8121	43.1211
										20.0804	43.2792
										20.3427	43.4391
										12.3198	43.6009
[truncated: 19,623 more rows]

## Sheet: Panel 6B
Figure 6B
	Distribution of PSD95 puncta counts
	Immature SC			Adult SC				Skewness calculated by scipy as Pearson's median skewness:
distance from soma	mean	SD	SEM	mean	SD	SEM		3 (mean − median)/standard deviation
soma	27	9.13392	3.22933	21.1667	6.24233	2.54842		Immature			Adult
5	46.3333	12.4399	4.14662	28.5	15.593	5.51297			PSD95			PSD95
15	87.4444	20.0382	6.67939	67.375	28.8045	10.1839			0.375696			-0.102603
25	81.6667	15.1327	5.04425	92.875	29.6139	10.4701
35	51	16.4469	5.48229	104	36.5474	12.9215
45	19.4444	11.4198	4.03749	109.5	38.0075	13.4377
55	7.77778	9.77241	4.37035	87.5	42.2408	14.9344
65	4.11111	8.5049	4.91031	67.5	32.4213	11.4627
75	1.88889			39.375	29.0366	10.266
85				10.375	8.59125	3.24719
95				3.375	6.08276	3.51188
105				0.125
	PSD95 puncta count
Immature SC
distance from soma	SC1	SC2	SC3	SC4	SC5	SC6	SC7	SC8	SC9
soma	20	36	38	30	30	40*	16	14	32
5	31	54	50	48	55	66	34	29	50
15	79	105	69	71	121	94	86	59	103
25	88	98	61	63	93	94	89	62	87
35	19	52	70	55	63	51	32	50	67
45		19	19	32	24	13	1	35	32
55		12		28	12			17	1
65		6		22				9		Average number of Puncta per SC				Statistical Test Performed
75				11				6		mean	SD	SEM		Mann-Whitney			P value
sum	237	382	307	360	398		258	281	372	324.375	61.5303	21.7543		Nb of puncta per SC Immature vs Adult			0.0007
*soma signal saturated, soma counts are ignored for average
Adult SC
distance from soma	SC1	SC2	SC3	SC4	SC5	SC6	SC7	SC8
soma	65*	18	27	30	19	44*	20	13
5	60	33	15	16	28	39	14	23
15	125	81	52	70	54	77	52	28
25	120	109	91	92	98	125	77	31
35	73	145	93	91	129	156	96	49
45	72	126	109	82	112	175	140	60
55	58	99	85	59	66	186	81	66
65	33	90	100	43	37	117	44	76
75	9	40	88	15	17	75	25	46
85		4	23	6	6	16	5	23
95			12			2		13		Average number of Puncta per SC
105								1		mean	SD	SEM
sum		745	695	504	566		554	429		582.167	118.212	48.26
*soma signal saturated, soma counts are ignored for average

## Sheet: Panel 6C
Figure 6C
	Distribution of dendritic segments
	Immature SC			Adult SC							Skewness calculated by scipy as Pearson's median skewness:
distance from soma	mean	SD	SEM	mean	SD	SEM					3 (mean − median)/standard deviation
5	879.444	223.184	74.3946	624.25	212.963	75.2937					Immature			Adult
15	1379.56	204.334	68.1115	1291.5	497.938	176.048					dendrites				dendrites
25	1259.78	107.568	35.8561	1666.25	378.567	133.844					0.31838				-0.0774088
35	729.111	230.136	76.7118	2082.12	521.157	184.257
45	311.333	172.885	61.1239	2163.38	549.561	194.299
55	104.556	135.752	55.4205	1795.5	713.093	252.116
65	69.2222	139.55	69.7751	1354.38	834.324	294.978
75	36			777.125	610.288	215.769
85				273.375	393.967	148.906
95				92.375	227.869	131.56
105				23.5
Immature SC
distance from soma	SC1	SC2	SC3	SC4	SC5	SC6	SC7	SC8	SC9
5	603	1189	797	1054	1115	989	617	651	900
15	1149	1719	1235	1480	1618	1454	1167	1215	1379
25	1128	1380	1097	1337	1324	1228	1161	1337	1346
35	298	738	949	831	873	732	393	833	915
45		360	369	514	373	222	7	563	394
55		140	3	340	185			265	8
65		106		337	5			175
75				185				139
Adult SC
distance from soma	SC1	SC2	SC3	SC4	SC5	SC6	SC7	SC8
5	1077	690	693	536	489	622	366	521
15	2441	1294	1280	1201	750	1163	992	1211
25	2300	1574	2126	1338	1473	1827	1399	1293
35	2705	2292	2768	1534	1769	2369	1800	1420
45	1956	2002	3108	1520	1584	2690	2467	1980
55	1369	1727	2549	1159	1093	2948	1223	2296
65	575	1441	2539	741	596	1790	678	2475
75	162	630	1323	330	288	1313	381	1790
85		136	422	96	82	198	89	1164
95			187			54		498
105								188

## Sheet: Panel 6D
Figure 6D
	Distribution of puncta density								Statistical Test Performed
	Immature SC			Adult SC					Mann-Whitney
distance from soma	mean	SD	SEM	mean	SD	SEM			distance from soma			P value
5	0.0529301	0.00786563	0.00262188	0.0446738	0.0141759	0.00501195			5			0.26847
15	0.0633398	0.0106861	0.00356205	0.053308	0.0156028	0.00551643			15			0.194
25	0.0651345	0.0125357	0.00417856	0.0558688	0.0161185	0.00569875			25			0.13583
35	0.0700751	0.00625561	0.0020852	0.051223	0.0172266	0.00609053			35			0.01077
45	0.0719587	0.0300636	0.0106291	0.0514475	0.0153624	0.00543144			45			0.27015
55	0.0703472	0.0409497	0.0167176	0.0502998	0.0140602	0.00497102			55			0.08136
65	0.0433286	0.0294457	0.0147229	0.0550388	0.0128725	0.00455113			65			0.447
75	0.0513125			0.0548102	0.0135641	0.00479562			75			0.6953
85				0.0537617	0.0221361	0.00836666			85
95				0.0424375	0.0195996	0.0113158			95
105				0.00531915					105
Immature SC
distance from soma	SC1	SC2	SC3	SC4	SC5	SC6	SC7	SC8	SC9
5	0.0514096	0.0454163	0.0627353	0.0455408	0.0493274	0.0667341	0.0551053	0.0445469	0.0555556
15	0.0687554	0.061082	0.0558704	0.047973	0.0747837	0.0646492	0.0736932	0.0485597	0.0746918
25	0.0780142	0.0710145	0.0556062	0.0471204	0.0702417	0.0765472	0.0766581	0.0463725	0.064636
35	0.0637584	0.0704607	0.0737619	0.0661853	0.0721649	0.0696721	0.0814249	0.060024	0.073224
45		0.0527778	0.0514905	0.0622568	0.0643432	0.0585586	0.142857	0.062167	0.0812183
55		0.0857143	0	0.0823529	0.0648649			0.0641509	0.125
65		0.0566038		0.0652819	0			0.0514286
75				0.0594595				0.0431655
Adult SC
distance from soma	SC1	SC2	SC3	SC4	SC5	SC6	SC7	SC8
5	0.0557103	0.0478261	0.021645	0.0298507	0.0572597	0.062701	0.0382514	0.0441459
15	0.0512085	0.0625966	0.040625	0.0582848	0.072	0.0662081	0.0524194	0.0231214
25	0.0521739	0.0692503	0.0428034	0.0687593	0.0665309	0.0684182	0.0550393	0.0239753
35	0.0269871	0.0632635	0.0335983	0.059322	0.0729226	0.0658506	0.0533333	0.034507
45	0.0368098	0.0629371	0.0350708	0.0539474	0.0707071	0.0650558	0.0567491	0.030303
55	0.0423667	0.0573248	0.0333464	0.050906	0.0603843	0.0630936	0.0662306	0.0287456
65	0.0573913	0.0624566	0.0393856	0.0580297	0.0620805	0.0653631	0.0648968	0.0307071
75	0.0555556	0.0634921	0.0665155	0.0454545	0.0590278	0.0571211	0.0656168	0.0256983
85		0.0294118	0.0545024	0.0625	0.0731707	0.0808081	0.0561798	0.0197595
95			0.0641711			0.037037		0.0261044
105								0.00531915

## Sheet: Panel 6E
Panel 6E		Immature SC					Adult SC
		Cell	soma ID	dendrite ID	dendrite length to center of soma		Cell	soma ID	dendrite ID	dendrite length to center of soma
		1	1542	1896	37.0681		1	5646	5775	8.83044
			1542	2084	39.4533			5646	4079	31.7671
			1542	2052	35.3089			5646	9559	14.8017
			1542	2018	43.7271			5387	6761	27.1995
			1542	1926	25.3475			5387	4197	29.0232
			1542	1744	39.8871			5387	4198	29.1414
			32	781	27.7424			5387	6651	38.4675
			32	228	36.4381			5387	6634	41.2713
			32	245	34.6273			5387	6510	52.5988
			32	320	22.9725			5387	6108	59.8321
			347	656	34.0001			5387	5117	55.2434
			347	909	37.2383			5387	4195	61.8455
			347	538	36.7323			5387	4080	70.918
			347	973	26.4691			5387	4126	70.1732
			1015	1251	44.5967			5387	4188	63.269
			1015	1502	36.5734			5387	9506	80.2931
			1015	1415	45.7983			5387	6440	56.8268
		2	888	1597	14.663			5387	6233	66.8292
			888	1141	30.2194			5387	6425	66.3906
			888	1136	31.7387			5387	6615	46.8763
			888	1557	40.6817			5387	6591	49.3273
			888	1552	42.741			5387	6760	38.2478
			888	1127	42.8377			5387	6744	45.7399
			888	1635	49.0599			5387	9265	35.3531
			888	1541	57.6809			5387	9224	37.4087
			888	1577	60.7901			5387	9248	38.3687
			888	1108	77.9326			5387	7931	42.9519
			888	1584	71.5866			5387	9155	43.8638
			888	1116	68.191			5387	8751	56.0071
			888	1119	65.6722			5387	8687	62.2231
			888	1571	58.6074			5387	8612	69.4159
			888	1544	53.9252			5387	8830	53.9366
			888	1114	52.1708			5387	8971	48.9514
			888	1546	48.0835			5387	9078	47.8358
			888	1125	47.2521			5387	9240	39.6781
			888	1561	38.6757			5387	9190	44.9563
			888	1568	34.0308			5387	9053	51.7089
			888	1161	28.7481			5387	8050	70.569
			888	1621	18.4837			5387	8008	80.8187
			888	1616	20.5147			5387	8633	62.8191
			888	1514	15.972			5387	8331	68.5184
			888	1591	14.4641			5387	8820	56.0209
			888	1506	13.0207			5387	7988	49.8309
			671	859	19.1973			5387	5100	68.422
			671	851	32.4381			5387	5116	57.3626
			671	855	22.3927			5387	8868	49.4682
			671	861	19.6385			5387	9126	46.9192
			671	796	26.7391			5387	9171	44.1945
			671	1631	42.4254			5387	9027	47.4798
			671	860	21.5685			5387	8735	55.5418
			85	1363	32.8823			5387	9393	51.339
			85	1322	29.589			5387	8248	69.1411
			85	1670	27.4721			5387	8349	68.0054
			85	213	31.2349			5387	9145	48.2425
			85	208	40.336			5387	9041	51.1094
			85	161	29.8773			5387	8660	59.309
			85	269	13.9755			5387	7716	84.0475
			85	267	18.9861			5387	7982	78.0767
			85	266	27.3066			5387	9211	41.939
			85	341	41.4316			5387	9323	34.3306
			85	356	44.9017			5387	9335	32.6275
			85	383	52.6382			5387	5008	61.6618
			85	290	27.4268			5387	4803	54.285
			404	657	20.0226			5387	4914	56.5458
			404	655	22.8165			5387	4578	48.7884
			404	644	26.1649			5387	9390	40.4909
			404	659	26.198			5387	4977	38.7671
			404	650	24.8853			5387	10022	30.652
			404	587	29.7137			5387	10169	47.246
			404	493	37.3229			5167	5591	28.451
			404	579	52.1929			5167	5569	28.7055
			404	582	40.9444			5167	5607	24.821
			404	585	33.454			5167	5593	18.7112
			404	1693	48.8928			5167	4430	45.6891
			404	1687	29.4281			5167	4468	42.724
			404	1517	33.8869			5167	4502	41.7873
			404	1522	38.3018			5167	4513	31.0816
			404	0	40.0493			5167	5327	18.2125
			404	1516	35.1256			9596	9894	32.3993
			404	1530	34.5113			9596	9908	28.5485
			1180	1429	21.0686			9596	9761	23.0699
			1180	1426	30.9537			9596	9873	17.2166
			1180	1433	16.2766			67	2871	20.2285
			1180	1625	20.245			67	3196	29.0089
			1180	1249	32.5824			67	2459	32.0428
			1180	1624	21.884			67	3522	26.2826
		3	841	0	32.2256			67	3902	19.4495
			841	13	35.7836			67	3723	23.9574
			841	242	42.8498			67	340	37.1632
			841	1138	23.5425			67	1866	29.4257
			841	43	47.5589			67	3572	27.7982
			841	908	31.4892			67	2473	36.6011
			841	935	29.8362			67	2188	39.5681
			940	205	28.4234			67	3510	29.9295
			940	191	42.7188			67	3802	23.6438
			940	151	53.3027			67	3781	21.461
			411	1056	41.258			67	3891	19.3013
			259	1234	20.8746			67	3918	15.7396
			259	510	42.0432			519	3479	27.1633
			259	811	32.8449			519	3737	22.0772
			259	393	50.2197			519	2635	32.9393
			259	1283	49.4154			519	3280	26.0864
			259	1292	20.084			519	3766	24.367
			259	1211	20.9673			519	3832	24.1793
			259	1217	17.2576			519	3080	29.1493
			537	1365	51.4229			519	18	31.9744
			537	1390	43.806			519	3817	23.5385
			537	1382	42.0532			519	3536	32.7579
			537	1260	50.9169			519	2077	44.0098
			537	758	56.3197			519	1925	50.5009
			537	698	58.3751			519	2007	48.0734
			537	769	52.4241			519	1955	49.0134
			537	798	42.7409			519	1141	63.5753
		4	988	1326	10.0378			519	1066	67.4919
			988	1322	9.92658			519	1162	60.5182
			988	1312	19.5135			519	1572	54.8079
			988	1308	23.3546			519	1808	53.9129
			988	1301	27.9728			519	1994	47.9073
			988	1304	37.6797			519	2266	42.9669
			988	1284	55.4111			519	2308	41.6679
			988	1282	56.3148			519	3354	33.1654
			988	1279	58.1594			519	2686	35.0305
			988	1230	81.8043			519	2757	33.8574
			988	1270	86.493			519	3167	32.2995
			988	1273	71.214			519	3982	12.349
			988	1274	65.7131			519	3957	11.4223
			988	1276	61.6206			519	3857	22.4714
			988	1299	54.9975			519	3368	27.7409
			988	1303	29.5509			519	3341	27.0392
			988	1311	22.0041			519	3870	23.371
			842	952	45.0812			519	3705	25.9421
			842	968	9.76544			519	3497	30.4342
			458	826	34.7471			519	2235	39.112
			458	645	49.7228			519	3994	48.681
			458	739	34.4592			519	1539	50.81
			458	725	46.1641			519	1634	46.6285
			458	49	50.9923			519	2207	39.8171
			458	54	49.0764			519	1749	45.0158
			458	56	44.6363			519	3557	29.3848
			458	51	41.4702			519	3687	26.7539
			458	547	33.921			519	3375	26.4346
			134	84	29.7845			519	3101	31.7188
			134	235	18.1214			519	2924	32.7685
			134	231	20.8888			519	2863	31.5552
			134	814	32.7747			519	3670	26.4487
			134	445	76.1035			519	2977	27.7967
			134	448	38.1601			519	3969	12.927
			134	780	24.073			519	3938	12.6641
			134	116	31.7364			519	3993	10.181
			1345	1884	33.2287		2	5658	6271	11.4667
			1345	1885	25.7455			5658	6584	25.6458
			1345	1770	19.7276			5658	6762	56.0268
			1345	1773	20.0807			5658	6496	15.8539
			1345	1747	35.9547			5658	6647	40.9485
			1345	1756	34.6431			5658	6479	32.0851
			1345	1759	21.3038			5658	6635	39.6478
			1345	1784	19.3382			5658	6466	38.5798
			1345	1796	15.7269			5658	6054	33.8413
			1345	1800	13.0602			5658	6249	63.363
			1345	1789	16.1964			5658	6030	68.1827
			1345	1581	79.5415			5658	6233	61.5932
			1345	1652	50.1385			5658	6178	51.1999
			1345	1663	21.0085			5658	6118	41.5261
		5	1570	1452	41.1338			5658	6194	36.7537
			1570	1475	38.2796			5658	6101	42.9682
			1570	1547	21.9208			5658	6039	27.1968
			1570	1544	33.8838			3787	5452	73.8824
			1570	1502	23.882			3787	4164	46.7083
			1570	2819	18.4604			3787	5625	52.1983
			1570	1496	37.4245			3787	4124	63.1832
			1570	2851	60.9404			3787	4139	60.4901
			1570	2928	54.9243			3787	4153	53.2906
			1570	1476	60.2742			3787	5380	46.3578
			1570	2791	20.7728			3787	970	66.5584
			1570	2892	32.2133			3787	1186	77.0179
			1570	2820	44.0245			3787	1123	73.6434
			1570	2769	22.9998			3787	1224	77.2409
			1570	2007	26.3171			3787	1098	86.5271
			1570	1479	66.7689			3787	5523	69.9994
			1570	1682	25.0308			3787	4679	64.3364
			930	1000	21.7179			3787	5338	59.5085
			1035	1347	26.8248			3787	5624	30.7581
			1035	1295	48.7578			3787	4948	46.156
			1035	1364	14.6635			3787	4938	47.4934
			33	319	14.5174			3787	4927	50.2749
			33	442	37.4821			3787	4904	51.3401
			33	578	42.3111			3787	5047	51.8765
			33	666	47.7401			3787	5169	47.9492
			33	287	49.0521			3787	4992	44.6493
			33	316	45.9415			1272	3765	58.2372
			33	630	28.7188			1272	4715	49.0726
			33	653	26.75			1272	5349	51.9082
			33	622	26.5881			1272	3744	62.3187
			33	662	14.6008			1272	5579	49.497
			33	638	12.2669			1272	4495	86.3512
			708	908	11.4414			1272	4476	92.6419
			708	907	44.4705			1272	4457	92.2754
		6	27	145	30.5525			1272	6818	57.5523
			387	506	32.6477			1272	3375	38.3582
			387	303	54.6088			1272	5144	57.0551
			387	304	34.0454			1272	3365	44.7511
			387	323	35.3508			1272	2010	47.5277
			387	669	49.4773			1272	1665	47.844
			387	319	34.4998			1272	1986	42.2035
			387	662	48.1668			1272	1613	53.4414
			709	688	49.6256			1272	2432	81.4403
			709	685	49.8169			1272	2573	60.0782
			1137	2104	26.7285			1272	2980	62.5615
			1137	1745	30.5366			1272	2933	72.9343
			1137	1821	47.2553			1272	3134	79.1901
			1137	1350	33.7464			1272	3230	82.1599
			1137	2289	29.0637			1272	2806	86.9979
			1681	2357	35.822			1272	2815	81.9498
			1681	2377	30.9213			1272	2880	90.3808
			1681	2376	44.6584			1272	3225	89.0903
			1681	2145	41.2375			1272	6805	75.94
			959	2242	33.9879			1272	3082	77.1172
			959	1123	40.348			1272	3272	72.9848
			959	1930	22.9055			1272	3168	71.2489
			959	2030	38.1052			1272	3027	68.9735
			959	2336	47.2364			1272	2960	64.1744
			959	2374	47.8178			1272	2561	63.393
			959	2368	54.9099			1272	2545	69.9775
			959	1587	52.8005			1272	2515	77.3473
			959	2329	36.0915			1272	2479	77.697
		7	1456	1419	46.3034			1272	2455	81.1507
			1456	1848	29.132			1272	2597	77.7584
			1456	1857	36.2361			1272	2525	70.4591
			1456	1695	44.2018			1272	2611	66.3156
			1456	1869	32.4549			1272	1583	56.1339
			1456	1465	7.24662			1272	2142	58.6129
			595	1409	34.5932			1272	2114	56.4038
			595	1392	25.6036			1272	2103	58.9505
			595	541	38.9678			1272	2153	60.8708
			595	1047	39.3965			1272	2111	58.9358
			595	1369	14.1743			1272	2089	63.7728
			595	555	27.2852			1272	2018	48.3887
			595	1286	19.7661			1272	2000	47.6336
			595	1166	38.4822			1272	1976	30.4919
			595	1877	36.8723			1272	1967	32.0514
			595	1415	41.8332			1272	1868	56.4706
			595	1329	23.9386			1272	1877	52.7561
			31	0	42.3931			1272	1894	48.6915
			31	249	42.5945			1272	1913	45.1072
			31	466	34.9691			1272	1929	41.2139
			31	510	35.5769			32	630	16.3958
			31	536	23.856			32	962	24.8954
		8	564	2727	14.274			32	594	34.0513
			564	3	37.5289			32	588	34.0974
			564	107	21.8825			32	523	39.074
			564	1477	19.3057			32	498	41.8543
			564	2518	23.3849			32	429	67.8678
			564	2431	27.6248			32	438	52.4341
			564	2701	70.7748			32	450	49.1866
			564	2563	36.1806			32	491	45.4347
			564	2369	32.445			32	530	36.2302
			564	1770	58.7827			32	969	19.5985
			564	1597	79.252			32	829	27.9227
			564	1293	86.3871			32	856	20.498
			564	1517	83.6869			32	893	19.9045
			564	1891	50.762			32	757	28.579
			564	2215	35.369			32	945	23.6445
			564	1858	52.0664			32	915	19.1535
			564	2312	35.332		3	1502	4897	58.3574
			564	2175	29.7038			1502	8193	72.5851
			564	2531	20.3249			1502	245	68.1922
			564	2521	20.3206			1502	2614	100.126
			564	2717	33.2067			1502	2176	103.326
			564	2718	31.4434			1502	8313	85.3056
			564	140	29.4335			1502	3332	85.2971
			564	2300	22.6168			1502	8322	82.6089
			564	1467	32.7863			1502	8304	76.5274
			564	2158	33.0028			1502	8333	82.2587
			564	2359	25.7917			1502	3770	78.7861
			564	2479	21.9967			1502	194	68.461
			564	2296	30.9743			1502	8298	69.111
			564	2380	32.2365			1502	3866	75.3356
			564	2326	35.1195			1502	5489	49.3605
			564	2196	36.5678			1502	8196	59.7528
			564	2054	54.1389			1502	8224	53.8939
			564	2133	48.3637			1502	240	51.4452
			564	1519	37.4835			1502	239	52.8574
			564	2473	19.405			1502	5024	49.0187
			186	1287	54.0497			1502	5915	40.2824
			186	518	65.4131			1502	6509	32.8815
			186	1928	33.307			1502	265	57.6057
		9	602	2570	24.8102			1502	6486	33.8996
			602	805	48.6891			1502	8277	29.9568
			602	2104	62.1478			1502	5789	40.2956
			602	1535	49.891			2812	7151	15.6932
			602	2390	39.0669			2812	7174	14.3644
			602	1058	57.1414			2812	136	59.836
			602	2799	60.289			2812	137	51.0297
			602	2806	38.2315			2812	183	37.6171
			602	2649	47.3647			2812	7478	43.135
			602	2665	49.7522			2812	7538	62.2011
			376	2601	25.1083			2812	8025	47.4743
			376	584	44.7467			2812	8028	57.0167
			376	2511	28.6654			2812	8031	65.4728
			376	2586	25.0496			2812	8039	72.7837
			376	2011	23.7932			2812	8069	74.5862
			376	2628	19.0501			2812	8041	79.545
			376	2642	19.0815			2812	7539	54.2137
			376	1983	43.3148			2812	7662	74.6413
			376	2403	41.6863			2812	8088	78.2237
			36	2118	39.6763			2812	8156	77.0547
			36	2305	34.3703			2812	8129	76.2741
			36	1627	30.1139			2812	8136	61.5962
			36	2027	55.8822			2812	8009	49.9273
			36	317	55.5373			2812	7475	38.4266
			36	1803	48.3825			2812	8348	49.5294
			36	1987	36.7418			2812	8347	49.9648
			36	2644	36.7918			2812	7111	21.4782
			36	2645	38.6416			2812	8258	30.3343
								2812	206	44.309
								2812	8263	44.8177
								2812	348	46.842
								2812	3714	35.1087
								2812	6889	34.3862
								2812	8233	37.8302
								2812	238	44.2973
								2812	539	47.6292
								2812	542	47.4663
								2812	7501	61.978
								2812	7500	59.5198
								2812	7485	55.5663
								2812	211	52.0004
								2812	222	48.8216
								2812	8242	43.8489
								2812	6839	39.514
								2812	8252	26.8022
								2812	330	38.8664
								2812	6939	27.8409
								2812	365	34.8629
								2812	8092	27.024
								2812	7082	21.7517
								2812	196	23.6152
								2812	195	24.5059
								2812	7188	12.8779
								745	7161	18.12
								745	6317	53.3296
								745	1404	62.6397
								745	7364	91.2159
								745	4090	78.0252
								745	3111	96.4118
								745	5474	66.4324
								745	665	75.0668
								745	707	82.9811
								745	6872	43.8038
								745	7430	45.969
								745	3273	51.1225
								745	7242	58.7183
								745	7241	60.624
								745	7238	60.7786
								745	6683	49.7871
								745	6757	39.1687
								745	6571	49.6193
								745	6793	45.6234
								745	5628	52.9284
								745	6116	55.9135
								745	6668	46.856
								745	7433	55.1664
								745	7436	54.8975
								745	7438	49.3033
								745	7439	43.8666
								745	8120	74.207
								745	4447	72.7011
								745	8125	72.7031
								745	5287	71.2546
								745	6527	53.403
								745	5377	70.6087
								745	5932	61.3422
								745	8441	76.7751
								745	4064	84.8935
								745	4546	81.7283
								745	5093	73.3284
								745	3512	101.321
								745	3647	93.1414
								745	6037	59.3641
								745	6707	51.5627
								745	6777	45.203
								745	6430	49.8461
								745	3676	36.8745
								745	6859	37.3495
								745	425	75.3709
								745	2576	71.6642
								745	6805	52.3342
								745	7524	63.0666
								745	8140	67.064
								745	327	69.588
								745	4442	82.401
								745	8150	68.1704
								745	7533	59.3082
								745	5207	75.5785
								745	5274	72.1363
								745	4239	86.3842
								745	4617	83.6977
								745	3622	64.2705
								745	4067	80.4565
								745	4510	76.0567
								745	4812	69.5327
								745	6749	50.8996
								745	5637	45.1252
								745	6906	43.8127
								745	445	81.3906
								745	6270	43.3742
								745	380	24.6304
								7192	397	16.2552
								7192	416	25.9189
							4	37	2841	28.423
								37	3040	34.7911
								37	1675	17.4217
								37	3219	25.3672
								37	2564	42.0052
								37	2800	35.6789
								37	2643	43.1215
								37	1884	59.8858
								37	2375	49.0687
								37	4778	50.8275
								37	4780	50.8244
								37	2626	43.5171
								37	2422	49.4277
								37	592	48.6894
								37	2463	52.0744
								37	473	78.466
								37	2060	65.4556
								37	574	73.9656
								37	585	68.1681
								37	2967	64.1015
								37	2968	62.7068
								37	2229	59.2328
								37	2774	37.1899
								37	2759	37.0579
								37	2732	40.3172
								37	1106	53.1444
								37	2255	51.6901
								37	2448	51.1378
								37	2712	43.2512
								37	2277	46.724
								37	2660	45.9781
								37	2631	41.1872
								37	2576	46.2446
								37	2286	53.6005
								37	1636	61.708
								37	1550	81.5357
								37	1719	79.3088
								37	3070	68.2116
								37	1608	65.9521
								37	1568	58.7801
								37	6	51.1722
								37	1	50.8395
								37	2156	50.8259
								37	2273	45.0185
								37	2593	49.2568
								37	1610	57.3054
								37	2095	57.9693
								37	2187	55.2348
								37	2679	45.0116
								37	1502	34.7999
								37	2818	22.1483
								37	2946	25.5792
								37	2960	14.8906
								1135	2268	54.932
								1135	2028	66.4274
								1135	3102	75.8347
								1135	3173	94.9933
								1135	13	72.2331
								1135	2996	72.7739
								1135	3043	41.3414
								1135	2885	33.6299
								3518	4403	36.138
								3518	4302	25.4516
								3518	4354	19.2839
								3518	3308	34.7113
								3518	4455	73.2617
								3518	4082	82.9801
								3518	3944	65.7799
								3518	4134	63.1335
								3518	4146	43.3468
								3518	4238	42.2756
								3518	3490	51.4129
								3518	4364	52.2317
								4487	4693	31.457
								4487	4774	32.9959
								4487	4725	26.3902
							5	1391	1558	58.0691
								1391	1701	56.3308
								1716	2193	40.7501
								1716	1879	56.9629
								1716	2201	55.638
								1716	2191	35.3843
								1716	2513	33.8331
								1716	2560	49.0711
								12	2493	38.8624
								12	566	38.918
								12	527	49.1183
								12	357	73.4663
								12	291	91.3617
								12	319	78.0809
								12	397	60.7178
								12	394	64.1394
								12	503	70.4502
								12	2310	54.4489
								12	620	49.139
								12	2189	33.9304
								12	2027	66.2767
								655	1373	35.4824
								655	1257	80.0102
								655	1283	60.3783
								655	1263	72.5888
								655	1159	86.1077
								655	1330	40.8519
								655	1321	46.5108
								655	2254	47.9406
								655	2273	45.5348
								655	864	55.7388
								655	878	57.5228
								655	849	64.8441
								655	853	56.2317
								655	921	53.0721
								655	903	49.3921
								655	2464	69.079
								655	2335	33.7878
								655	2167	64.557
							6	4869	8813	44.1745
								4869	8828	40.2534
								4869	6984	67.1553
								4869	7028	66.6817
								4869	7036	67.0096
								4869	7067	66.7572
								4869	7134	69.4759
								4869	7206	69.2508
								4869	8635	75.6449
								4869	5336	81.2018
								4869	7240	86.062
								4869	8905	40.2746
								4869	6185	31.7531
								4869	6054	52.2921
								4869	6171	46.9849
								4869	6180	40.9629
								4869	5756	58.5298
								4869	5943	59.7626
								4869	5613	46.9002
								4869	5608	52.6242
								4869	5651	52.3495
								4869	5641	52.4733
								4869	8186	66.2982
								4869	6100	32.7566
								4869	6912	39.2696
								4869	6625	47.7748
								4869	6703	49.0317
								4869	6721	51.1405
								4869	6819	53.1673
								4869	6818	58.5462
								4869	8316	71.4216
								4869	6584	69.9152
								4869	8288	59.5101
								4869	6808	55.4723
								4869	8268	59.1501
								4869	6797	62.7817
								4869	8257	56.9461
								4869	8214	45.7879
								4869	6682	49.811
								4869	3	56.0996
								4869	6853	37.1122
								4869	6903	36.4369
								4869	6253	24.196
								33	8719	33.0223
								33	8548	73.2507
								33	8643	86.7154
								33	8623	85.791
								33	8487	64.4528
								33	8751	41.3279
								33	8877	38.2812
								33	4787	84.6479
								33	4831	86.1715
								33	4516	85.344
								33	8381	62.074
								33	8364	66.2024
								33	58	8.25434
								33	7437	48.5252
								33	2085	81.0436
								33	7756	58.5438
								33	7740	58.8706
								33	7516	62.2181
								33	7567	70.0277
								33	7872	78.9191
								33	7776	83.0127
								33	2273	77.9331
								33	7659	84.313
								33	7614	87.1715
								33	2350	64.6598
								33	2358	53.6242
								33	3163	66.0038
								33	3040	59.8698
								33	3240	48.0685
								33	3211	50.5506
								33	3229	43.2275
								33	7412	46.7363
								33	7515	51.6449
								33	7349	56.3284
								33	7382	57.5096
								33	2835	77.0441
								33	2895	71.9307
								33	2768	82.4407
								33	2744	79.938
								33	2696	80.961
								33	2653	80.3202
								33	2635	99.6961
								33	2871	76.6408
								33	7376	67.1116
								33	7357	61.4215
								33	7399	50.7172
								33	7482	40.6719
								33	7998	53.1493
								33	1122	69.7012
								33	1311	64.047
								33	1298	65.2998
								33	1363	66.7386
								33	986	69.7468
								33	1012	67.0681
								33	1005	66.4791
								33	1235	73.4344
								33	1684	56.2772
								33	1634	58.2614
								33	1625	64.5671
								33	1699	54.3063
								33	1715	48.0724
								33	1723	48.6982
								33	1463	44.8654
								33	8049	46.3056
								33	0	40.0381
								3268	3899	37.8988
								3268	3724	67.8607
								3268	3500	43.4706
								3268	4058	26.4657
								3268	4032	35.9907
							7	3161	3250	38.0999
								3161	3435	46.8868
								3161	3449	45.584
								3161	3468	51.1381
								3161	3465	50.6047
								3161	3277	38.6221
								3161	3409	85.3701
								3161	4020	28.8951
								3161	3717	26.9714
								3161	3893	57.5156
								3161	4250	60.3419
								3161	4303	51.622
								3161	4118	54.1214
								3161	4142	50.6625
								3161	3999	26.4832
								3161	3990	24.3832
								3161	3580	38.5303
								3161	3499	22.5004
								3161	4359	36.0923
								3161	3716	36.7955
								1403	2284	55.3638
								1403	2361	57.1033
								1403	2323	56.2506
								1403	2189	44.7386
								1403	2010	25.1886
								1403	328	43.149
								1403	3116	50.2346
								1403	3145	55.3887
								1403	3064	62.2035
								1403	1368	70.4541
								1403	411	65.6822
								1403	988	75.7184
								1403	1044	94.3353
								1403	1047	82.3394
								1403	1053	76.9993
								1403	1054	68.5415
								1403	1224	82.1196
								1403	1239	79.731
								1403	2586	73.7788
								1403	2576	78.6896
								1403	2593	66.0424
								1403	2456	70.0408
								1403	2665	48.4742
								1403	2719	57.4889
								1403	2899	66.0882
								1403	2644	52.1947
								1403	1131	62.1132
								1403	2794	59.6527
								1403	2950	78.4439
								1403	687	72.9574
								1403	2365	28.5775
								1403	1943	22.6486
								1403	1882	49.7964
								1403	2917	61.3476
								1403	1915	51.8942
								1403	1766	55.0828
								1403	1855	49.2584
								1403	1842	50.9113
								1403	1826	52.2713
								1403	1980	29.6116
								34	145	43.2345
								34	7	50.1006
								34	306	48.6533
								34	266	56.3639
								34	298	48.0533
							8	821	5067	65.7943
								821	5016	77.2965
								821	5515	81.3282
								821	4855	54.4104
								821	6527	73.2384
								821	6542	74.9636
								821	5601	74.3842
								821	4717	72.8395
								821	4607	77.5696
								821	807	76.2686
								821	820	75.3966
								821	767	76.1646
								821	4248	84.9791
								821	4232	92.2059
								821	4264	90.9526
								821	4280	91.3734
								821	4307	94.9526
								821	4288	95.0385
								821	4174	109.343
								821	4183	102.953
								821	4318	67.5664
								821	9115	107.9
								821	8827	93.5844
								821	8812	104.624
								821	8845	89.8808
								821	8925	41.6653
								821	0	72.0528
								821	82	87.4948
								821	3195	52.9334
								821	2943	30.4363
								821	2955	28.1643
								821	2900	55.598
								821	5603	68.2062
								821	8929	71.1781
								821	2919	85.4058
								821	2364	87.3045
								821	2600	113.951
								821	2819	95.0001
								821	2864	81.6266
								821	2887	64.193
								821	2968	23.3275
								821	6026	29.1289
								3279	5067	65.7943
								3279	5016	77.2965
								3279	5515	81.3282
								3279	4855	54.4104
								3279	6527	73.2384
								3279	6542	74.9636
								3279	5601	74.3842
								3279	4717	72.8395
								3279	4607	77.5696
								3279	807	76.2686
								3279	820	75.3966
								3279	767	76.1646
								3279	4248	84.9791
								3279	4232	92.2059
								3279	4264	90.9526
								3279	4280	91.3734
								3279	4307	94.9526
								3279	4288	95.0385
								3279	4174	109.343
								3279	4183	102.953
								3279	4318	67.5664
								3279	9115	107.9
								3279	8827	93.5844
								3279	8812	104.624
								3279	8845	89.8808
								3279	8925	41.6653
								3279	0	72.0528
								3279	82	87.4948
								1883	3195	52.9334
								1883	2943	30.4363
								1883	2955	28.1643
								1883	2900	55.598
								1883	5603	68.2062
								1883	8929	71.1781
								1883	2919	85.4058
								1883	2364	87.3045
								1883	2600	113.951
								1883	2819	95.0001
								1883	2864	81.6266
								1883	2887	64.193
								1883	2968	23.3275
								1883	6026	29.1289
								870	3245	23.9447
								870	1377	43.8218
								870	1773	51.5786
								870	1786	49.9751
								870	1657	70.2863
								870	1631	79.0977
								870	1617	82.1214
								870	1671	57.3236
								870	5376	50.7851
								870	5405	41.1644
								870	5460	44.4566
								870	1301	32.0937
								870	1293	25.3824
								870	1219	49.5812
								870	1230	44.6937
								870	1256	44.1517
								870	1243	36.6264
								870	6435	51.8237
								870	656	69.5604
								870	674	72.8522
								870	6496	67.8327
								870	6325	83.1599
								870	6383	63.5445
								870	6860	62.8722
								870	6573	32.8165
								870	6859	61.2612
								870	6785	72.6059
								870	3251	23.3503
								6877	7302	49.6406
								6877	7219	69.5921
								6877	7250	71.0946
								6877	7269	67.1565
								6877	7291	58.1619
								6877	568	35.6726
								6877	612	58.0313
								6877	188	63.7407
								6877	172	75.0483
								6877	8597	76.9248
								6877	8581	82.9472
								6877	8612	85.1947
								6877	178	71.0016
								6877	205	60.7457
								6877	655	50.2296
								6877	380	61.0326
								6877	454	58.3897
								6877	508	47.8759
								6877	484	46.2945
								6877	550	44.3584
								6877	559	33.0369
								6877	8229	46.8
								6877	8363	72.2661
								6877	8425	68.3471
								6877	8397	68.3508
								6877	8498	60.8215
								6877	8489	61.0331
								6877	7942	59.8746
								6877	7943	60.4744
								6877	9220	78.136
								6877	9251	70.6905
								6877	8134	82.8931
								6877	8172	79.4856
								6877	8162	78.642
								6877	8156	80.419
								6877	8178	76.6841
								6877	7532	49.1403
								6877	7726	28.103
								6877	7863	33.4053
								6877	7850	35.4963
								6877	8228	39.7672

## Sheet: Panel 6F
Figure 6F
		Max dendritic length (um)
		Immature SC	Adult SC
		36.3555	73.8504		Statistical Test Performed
		67.7921	84.976		Mann-Whitney			P value
		48.1899	98.5719		Immature vs. Adult			0.0006
		72.3872	89.5917
		54.5836	83.849
		45.1152	71.8492
		37.7095	88.4017
		75.7776	104.089
		49.984

## Sheet: Panel 6G
Figure 6G
	Sholl analysis
	Immature SC			Adult SC
radius	mean	SD	SEM	mean	SD	SEM
0	0	0	0	0	0	0
1	3.125	0.927025	0.327753	3.25	0.433013	0.153093
2	3.625	0.992157	0.35078	3.625	0.992157	0.35078
3	3.75	1.08972	0.385276	3.625	0.992157	0.35078
4	3.75	1.08972	0.385276	3.625	0.992157	0.35078
5	4	1.32288	0.467707	3.875	0.927025	0.327753
6	5	2.29129	0.810093	4.5	2.5	0.883883
7	5.75	2.53722	0.897044	5.125	2.71282	0.959126
8	6.625	2.23257	0.789333	5.375	2.6428	0.93437
9	7.625	2.23257	0.789333	6.5	3.5	1.23744
10	9.125	2.89126	1.02221	7.25	3.38194	1.1957
11	10.25	2.4367	0.861503	8.75	4.3229	1.52838
12	10.5	2.59808	0.918559	9.375	4.44234	1.5706
13	11.75	2.77263	0.980274	10	6.46142	2.28446
14	12	2.59808	0.918559	10.625	5.61109	1.98382
15	12.5	2.06155	0.728869	11.75	5.60692	1.98234
16	13	1.93649	0.684653	12.625	6.70704	2.3713
17	13.875	1.45237	0.51349	14.125	7.49062	2.64833
18	13.25	1.08972	0.385276	14.25	8.04285	2.84358
19	12.875	1.76334	0.623436	15.25	8.04285	2.84358
20	13.5	2.12132	0.75	16.625	8.42522	2.97877
21	13.5	2.34521	0.829156	16.125	6.79039	2.40076
22	12.75	2.04634	0.72349	16.75	6.60965	2.33686
23	12.625	2.05776	0.727528	16.875	6.60374	2.33477
24	12.125	1.83286	0.648014	17.375	5.54386	1.96005
25	12.125	1.61536	0.571115	18	5.70088	2.01556
26	11.25	1.98431	0.701561	17.5	3.96863	1.40312
27	11.75	1.92029	0.678924	16.75	4.60299	1.6274
28	10.375	1.49478	0.528485	16.375	4.49826	1.59038
29	9.25	1.92029	0.678924	16.625	4.84607	1.71334
30	9.75	3.03109	1.07165	16.75	4.73682	1.67472
31	8.25	2.58602	0.914296	17.125	3.88708	1.37429
32	7.625	2.39466	0.846639	16.75	4.86698	1.72074
33	7.75	2.4367	0.861503	17.75	4.8926	1.72979
34	6.75	2.33184	0.824432	18.875	6.58478	2.32807
35	6.25	1.71391	0.60596	19.125	4.78115	1.69039
36	5.25	2.58602	0.977424	18.125	4.6754	1.653
37	5.85714	1.72615	0.652423	18.25	6.99553	2.47329
38	5.57143	0.903508	0.341494	16.5	5.33854	1.88746
39	4.42857	1.17803	0.445254	15.875	6.09175	2.15376
40	3.42857	1.39971	0.52904	16.125	6.21364	2.19685
41	3.28571	1.57791	0.557875	16.625	6.66966	2.35808
42	3	1.60357	0.566947	16.5	6.72681	2.37829
43	3.14286	1.72615	0.652423	18.25	7.74193	2.73719
44	2.71429	1.38505	0.5235	17.75	7.61167	2.69113
45	2.28571	1.27775	0.521641	17	7.28011	2.57391
46	2.16667	1.34371	0.600925	15.375	8.19966	2.89902
47	2.8	0.979796	0.438178	14.875	8.08451	2.85831
48	2.6	0.8	0.357771	14.5	8.13941	2.87772
49	2	1.26491	0.632456	13.375	6.96307	2.46182
50	2.5	0.866025	0.433013	12.375	6.96307	2.46182
51	2.25	0.433013	0.216506	11.875	7.23598	2.5583
52	2	0.707107	0.353553	11.625	7.8412	2.77228
53	2.25	1.08972	0.544862	10.375	6.57529	2.32471
54	2	0.707107	0.353553	10.5	6.89202	2.60494
55	1.5	0.866025	0.433013	10.1429	4.76381	1.80055
56	1.5	0.866025	0.433013	10.1429	4.0507	1.53102
57	1.25	1.08972	0.629153	9.28571	3.69224	1.39554
58	1.66667	0.942809	0.544331	9	3.8545	1.45686
59	2.33333	1.24722	0.720082	7.57143	3.65893	1.38294
60	2	0.816497	0.471405	7.14286	3.68117	1.39135
61	3	0	0	7	3.89138	1.4708
62	2.33333	0.471405	0.272166	6.71429	3.28261	1.24071
63	2.33333	0.471405	0.272166	5.28571	2.81396	1.06358
64	2	0.816497	0.471405	4.71429	2.24972	0.850313
65	2	0.816497	0.471405	4.14286	1.95876	0.740341
66	1.66667	0.942809	0.544331	3.28571	1.66599	0.629684
67	1.66667	0.942809	0.544331	3.42857	1.76126	0.665694
68	1.66667	0.942809	0.544331	3.14286	1.80702	0.682988
69	0.666667			3	2.32993	0.880631
70	2			2.71429	2.18529	0.825964
71	1			2.14286	2.03038	0.908014
72	2			2.6	1.62481	0.726636
73	2			2	1.78885	0.894427
74	2			2.5	2.06155	1.19024
75	2			2
76	2			5
77	2			3
78	1			3
79	1			4
80	1			4
81	1			2
82	1			2
83	0			2
84				1
85				1
86				1
87				1
88				1
89				1
90				1
91				1
92				1
93				1
94				1
95				1
96				0
Immature SC
Radius	27-03-2019-7-8	27-03-2019-9-12	27-03-2019-14-19	27-03-2019-20-25	28-03-2019-1-4	28-03-2019-5-6	28-03-2019-9-12	28-03-2019-13-18
0	0	0	0	0	0	0	0	0
1	4	4	2	3	4	4	2	2
2	4	4	4	4	5	4	2	2
3	4	4	4	5	5	4	2	2
4	4	4	4	5	5	4	2	2
5	4	5	4	5	6	4	2	2
6	4	8	4	6	9	4	2	3
7	4	10	6	8	8	4	2	4
8	5	11	7	8	8	6	4	4
9	5	11	6	9	10	6	9	5
10	5	15	8	9	12	7	8	9
11	6	13	9	12	13	9	12	8
12	7	16	10	10	13	10	9	9
13	9	18	13	11	13	10	9	11
14	9	18	10	13	13	11	11	11
15	11	16	12	15	14	11	10	11
16	11	16	14	14	14	14	10	11
17	14	14	13	16	15	15	13	11
18	13	14	11	14	15	13	13	13
19	10	14	11	13	14	16	12	13
20	10	16	12	12	15	16	12	15
21	9	16	12	13	16	16	12	14
22	9	15	12	12	15	15	11	13
23	8	15	13	13	14	14	11	13
24	9	15	10	12	12	14	12	13
25	10	13	11	11	11	15	12	14
26	12	9	8	12	11	15	11	12
27	10	10	9	14	11	14	12	14
28	10	9	8	12	11	10	10	13
29	10	7	7	12	10	8	8	12
30	8	5	7	11	15	9	10	13
31	5	5	8	8	11	9	7	13
32	4	4	8	8	10	9	7	11
33	4	4	8	10	9	9	7	11
34	4	3	6	8	7	8	7	11
35	4	3	6	8	7	7	7	8
36	0	2	6	7	6	7	6	8
37		2	6	7	6	6	6	8
38		4	5	6	6	5	6	7
39		3	3	5	4	4	6	6
40		2	2	4	4	2	6	4
41		2	2	4	4	1	6	4
42		3	1	4	3	1	6	3
43		4	1	4	4	1	6	2
44		3	1	3	4	1	5	2
45		3	0	3	3	1	4	2
46		2		3	3	0	4	1
47		3		3	3		4	1
48		3		3	3		3	1
49		2		4	2		2	0
50		2		4	2		2
51		2		3	2		2
52		2		3	1		2
53		2		4	1		2
54		2		3	1		2
55		1		3	1		1
56		1		3	1		1
57		1		3	0		1
58		1		3			1
59		1		4			2
60		1		3			2
61		3		3			3
62		2		3			2
63		2		3			2
64		1		3			2
65		1		3			2
66		1		3			1
67		1		3			1
68		1		3			1
69		0		2			0
70				2
71				1
72				2
73				2
74				2
75				2
76				2
77				2
78				1
79				1
80				1
81				1
82				1
83				0
Adult SC
Radius	25-07-2019_26-31	19-03-2019_06	21-03-2019_1-6	21-03-2019_9-12	25-07-2019_1-9	25-07-2019_10-17	25-07-2019_21-25	21-03-2019_13-17
0	0	0	0	0	0	0	0	0
1	3	4	3	3	3	3	3	4
2	3	6	3	3	4	3	3	4
3	3	6	3	3	4	3	3	4
4	3	6	3	3	4	3	3	4
5	3	6	4	4	4	3	3	4
6	3	11	4	4	4	3	3	4
7	4	12	5	5	4	3	3	5
8	4	12	6	5	4	4	3	5
9	4	15	6	8	5	5	3	6
10	5	15	6	9	6	8	3	6
11	6	20	8	7	6	8	7	8
12	8	21	8	8	6	8	8	8
13	9	27	7	8	7	8	7	7
14	10	25	8	9	7	10	10	6
15	12	26	8	11	7	10	11	9
16	12	30	9	11	8	10	12	9
17	13	33	7	15	10	10	13	12
18	13	35	8	14	10	12	12	10
19	14	36	9	14	10	14	12	13
20	15	38	11	18	10	15	12	14
21	14	33	11	18	10	13	15	15
22	15	34	15	15	15	15	13	12
23	14	34	17	14	13	16	14	13
24	18	31	15	16	13	19	14	13
25	18	31	13	22	16	17	15	12
26	18	25	15	22	17	17	14	12
27	21	15	16	23	15	20	17	7
28	21	16	17	21	14	18	18	6
29	21	14	16	24	16	20	15	7
30	19	14	14	25	15	22	16	9
31	18	13	13	23	17	17	23	13
32	23	12	13	22	15	21	19	9
33	22	17	12	23	14	21	23	10
34	24	15	13	29	14	22	25	9
35	23	17	13	24	15	24	24	13
36	21	14	14	26	15	24	18	13
37	26	15	18	32	13	19	14	9
38	23	12	17	25	13	19	15	8
39	22	7	20	25	13	19	12	9
40	23	9	19	25	12	21	12	8
41	23	7	16	28	10	22	14	13
42	24	7	18	28	10	19	11	15
43	24	8	21	33	10	21	12	17
44	25	8	21	31	12	22	11	12
45	26	8	22	27	11	21	11	10
46	27	4	22	21	10	23	7	9
47	29	4	21	18	9	21	7	10
48	28	4	24	15	9	20	7	9
49	24	3	20	16	10	19	6	9
50	23	3	15	16	9	21	6	6
51	23	1	17	15	9	19	5	6
52	17	1	13	14	7	28	6	7
53	16	1	12	12	9	23	4	6
54	19	0	11	12	6	22	4	10
55	16		9	11	6	18	5	6
56	14		11	14	6	15	5	6
57	12		10	12	5	15	5	6
58	15		8	14	5	10	5	6
59	7		8	14	5	11	2	6
60	9		8	11	5	12	1	4
61	9		8	13	5	10	1	3
62	7		9	11	7	9	1	3
63	5		6	7	6	10	1	2
64	5		5	6	6	8	1	2
65	5		4	6	4	7	1	2
66	5		3	4	2	6	1	2
67	5		4	4	1	6	1	3
68	5		3	4	1	6	1	2
69	6		2	3	1	7	1	1
70	5		2	2	1	7	1	1
71	4		2	2	1	6	0	0
72	4		1	2	1	5
73	3		1	0	1	5
74	5		1		0	4
75	5		1			0
76	9		1
77	6		0
78	3
79	4
80	4
81	2
82	2
83	2
84	1
85	1
86	1
87	1
88	1
89	1
90	1
91	1
92	1
93	1
94	1
95	1
96	0

## Sheet: Panel 6H
Panel 6H
		Number of branch points per primary dendrites per SC
		Immature SC				Adult SC
		Cell				Cell
		1	2.3			1	5
		2	1.6			2	6.3			Statistical Test Performed
		3	1.6			3	12			Mann-Whitney			P value
		4	2			4	4.3			Immature vs. Adult			0.0011
		5	2.8			5	4
		6	1.6			6	14.3
		7	3			7	8.3
		8	5			8	10.7
		9	4.33			AVERAGE	8.1125
		AVERAGE	2.69222
		Number of branch points per primary dendrites - all values
		Immature SC				Adult SC
		2				0
		2				11				Statistical Test Performed
		3				1				Mann-Whitney			P value
		2				18				Immature vs. Adult			0.0038
		3				0
		4				0
		1				3
		0				11
		0				8
		2				3
		0				24
		2				13
		3				11
		1				0
		4				12
		3				1
		0				3
		0				1
		3				7
		3				7
		0				1
		1				1
		7				26
		2				3
		0				14
		3				2
		2				16
		1				7
		2				14
		5				9
		3				9
		1
		9
		5
		2
		6

## Sheet: Panel 6I
Panel 6I		Number of primary dendrites (um)
		Immature SC
		Cell	number of main branches
		1	4
		2	5			Statistical Test Performed
		3	5			Mann-Whitney			P value
		4	5			Immature vs. Adult			0.6833
		5	4
		6	5
		7	3
		8	2
		9	3
		AVERAGE	4
		Adult SC
		Cell	number of main branches
		1	6
		2	4
		3	4
		4	4
		5	4
		6	3
		7	3
		8	3
		AVERAGE	3.875
