# Supplementary material for: Developmental emergence of two-stage nonlinear synaptic integration in cerebellar interneurons
Source: eLife. 2021 Nov 3;10:e65954. doi: 10.7554/eLife.65954 (PMC8565927; doi:10.7554/eLife.65954)
Supplement: Figure 7—source data 1. [file elife-65954-fig7-data1.xlsx]

## Sheet: Panel 7B
Figure 7B		Relative PSD95 number
	Distance from soma	Immature SC	Adult SC
	soma	0.0826531	0.0335092
	5	0.141837	0.0451187
	15	0.267687	0.106662
	25	0.25	0.147032
	35	0.156122	0.164644
	45	0.0595238	0.173351
	55	0.0238095	0.138522
	65	0.012585	0.10686
	75	0.00578231	0.0623351
	85		0.0164248
	95		0.00534301
	105		0.000197889

## Sheet: Panel 7D
Figure 7D			sim mEPSC - immature SC
			amp (pA)	rise time (ms)	Half-width (ms)			Statistical Test Performed
	MEAN		50.2817	0.184268	0.799762			Mann-Whitney			P value
	SD		3.30753	0.0129906	0.110897			EPSC amplitude			0.00103
	SEM		1.25013	0.00490997	0.0419151			EPSC Rise time			0.00103
	n		7	7	7			EPSC half-with			0.00103
	min		45.778	0.163028	0.667631
	max		54.2287	0.199039	0.940043
dend nb	1		46.0123	0.192725	0.936736
	2		50.5924	0.199039	0.835655
	3		54.2287	0.163028	0.667631
	4		51.2468	0.181767	0.756247
	5		45.778	0.193113	0.940043
	6		50.6045	0.188833	0.78227
	7		53.5092	0.171369	0.679755
			sim mEPSC - Adult SC
			amp (pA)	rise time (ms)	Half-width (ms)
	MEAN		25.1371	0.257038	1.16193
	SD		1.90942	0.0165915	0.13771
	SEM		0.636473	0.0055305	0.0459035
	n		9	9	9
	min		22.4542	0.226387	0.999103
	max		27.7847	0.28547	1.38493
dend nb	1		22.4542	0.28547	1.38493
	2		27.7847	0.226387	0.999103
	3		26.8482	0.247905	1.02608
	4		26.1651	0.247974	1.08074
	5		22.9911	0.25982	1.28731
	6		25.8913	0.270047	1.10207
	7		26.4699	0.255219	1.07495
	8		23.3014	0.266884	1.31298
	9		24.3281	0.253634	1.18918
