# Supplementary material for: Developmental emergence of two-stage nonlinear synaptic integration in cerebellar interneurons
Source: eLife. 2021 Nov 3;10:e65954. doi: 10.7554/eLife.65954 (PMC8565927; doi:10.7554/eLife.65954)
Supplement: Figure 8—source data 1. [file elife-65954-fig8-data1.xlsx]

## Sheet: Panel B
Figure 1 - figure supplement 1 The amplitude of direct EPSCs and outward currents are not correlated.
	Figure 1 - figure supplement 1B
	BL		10V		20V		30V		40V
	Inward current peak (pA)	Outward current peak (pA)	Inward current peak (pA)	Outward current peak (pA)	Inward current peak (pA)	Outward current peak (pA)	Inward current peak (pA)	Outward current peak (pA)	Inward current peak (pA)	Outward current peak (pA)
	0.127773	-1.31651	-0.426045	-1.12938	-119.358	-0.9238	-604.816	1.9163	-616.603	4.2581
	-1.85685	1.22785	-2.52516	1.6798	-303.352	-0.0519	-522.994	11.1607	-520.2	9.4538
	0.885449	0.895931	-1.15314	-1.72568	-81.1872	0.87439	-436.828	-4.3724	-505.606	11.3819
	-0.684675	1.02338	2.39118	2.65192	2.29389	5.10106	-528.4	8.8622	-576.669	7.6354
	0.294614	0.2454	-3.54893	-0.619777	-77.2073	0.265826	-508.774	9.1993	-491.453	7.4787
	-1.65966	0.018	-4.01409	-0.444504	-167.979	-4.57511	-363.069	-3.9201	-580.828	11.716
	-1.47768	1.16872	-76.385	-2.56364	-321.422	2.02566	-403.443	8.0833	-518.893	8.3055
	2.85556	1.11454	-3.60573	3.81456	-254.494	1.12857	-502.415	7.9323	-468.73	10.8292
	1.89638	0.87137	-81.1584	-0.96921	-259.258	1.15627	-607.566	10.4916	-514.434	2.2904
	-0.476694	1.01051	-0.91874	2.31322	-290.492	-2.78894	-301.595	-4.9717	-581.449	7.7153
	-0.945307	0.813	-1.86087	3.61	-98.5293	12.5565	-414.759	7.1937	-548.37	9.2436
	-0.159593	-0.784619	-6.95262	0.614897	-168.316	0.123	-400.598	10.166	-499.494	6.9662
	0.456654	-1.09504	-2.01615	-1.2572	-146.492	-5.12873	-403.081	10.7585	-667.756	6.7416
	1.93945	-0.306785	-4.35737	1.49197	-103.503	0.0661	-352.68	12.9321	-496.086	6.9635
	0.174779	-0.92228	-1.27545	0.476096	-178.736	-8.15597	-493.84	5.6976	-571.893	10.2371
	0.89705	-2.55538	-2.88998	-1.51509	-163.827	-6.19626	-571.914	5.7895	-475.482	10.981
	-0.197518	-1.07792	1.16286	-1.30682	-174.244	-1.87	-420.167	12.4307	-592.714	12.5625
	-0.775638	-0.853347	0.0621	-0.0386	-138.1	1.502	-405.199	9.7452	-672.234	8.5887
	-1.42277	0.117	0.195886	1.9	-145.604	2.23384	-457.815	11.6485	-495.737	10.4229
	Summary Statistics
	BL		10V		20V		30V		40V
	Inward current peak (pA)	Outward current peak (pA)	Inward current peak (pA)	Outward current peak (pA)	Inward current peak (pA)	Outward current peak (pA)	Inward current peak (pA)	Outward current peak (pA)	Inward current peak (pA)	Outward current peak (pA)
N traces	19		19		19		19		19
Mean	-0.00677242	-0.0213949	-9.96188	0.367506	-167.885	-0.139875	-457.89	6.881	-547.09	8.62
SD	1.29331	1.08999	24.3564	1.89419	85.2557	4.48707	85.735	5.669	61.064	2.598
	Statistical Test Performed
	Linear least squares regression analysis
		20V		30V		40V
	Equation	Y = 0,01294*X + 0,002033		Y = -0,01409*X + 0,0004309		Y = 0,005934*X + 0,01187
	Is slope significantly non-zero? - F test
	F	1.094		0.8082		0.3373
	DFn, DFd	1, 17		1, 17		1, 17
	P value	0.3102		0.3812		0.569

## Sheet: Panel 8A
Figure 8A		Immature SC
		eEPSC PPR
		Soma	Dendrite
	MEAN	2.10949	1.75819
	Median	2.0649	1.68388
	SD	0.34095	0.27799
	SEM	0.10782	0.07178
	n	10	15
	min	1.46226	2.58726
	max	1.3347	2.22436
					Statistical Test Performed
		2.13057	2.18017		Mann-Whitney			P value
		2.58726	1.84113		Immature vs Adult			0.0184
		1.46226	1.68388
		2.02032	1.40246
		1.97404	1.33483
		2.02342	1.66542
		2.10638	1.67725
		2.57398	1.99401
		1.83527	1.79941
		2.38136	1.83571
			1.3347
			2.22436
			1.65987
			2.06467
			1.67496

## Sheet: Panel 8B
	Figure 8B
			Immature SC
			eEPSC PPR
				Ra 100	Ra 150	Ra 200
			soma	2.0513	2.04677	2.04845
			dend1	1.40874	1.33444	1.2883
			dend2	1.49689	1.42335	1.37349
			dend3	1.5762	1.49416	1.43216

## Sheet: Panel 8C
Figure 8C		Subthreshold input-output relationship of sim eEPSP
		Immature SC
					distance from soma (um)
		Nb of quanta	Algebric sum	soma	5	15	25	35	45	55	65	75	85	95
		1	1.99766	1.99766	1.8714	1.69073	1.58499	1.54831	1.52071	1.50006	1.48577	1.44955	1.40848	1.3582
		5	9.9883	9.11852	8.35559	7.2884	6.66281	6.32606	6.02483	5.78951	5.61146	5.16305	4.71148	4.24646
		10	19.9766	16.4516	14.7	12.4312	11.1038	10.2862	9.55355	8.97486	8.54222	7.58886	6.71431	5.88672
		20	39.9532	27.3708	23.74	19.3233	16.766	15.0941	13.6221	12.4766	11.6352	10.075	8.73572	7.53071
		Adult SC
					distance from soma (um)
		Nb of quanta	Algebric sum	soma	5	15	25	35	45	55	65	75	85	95
		1	1.21449	1.21449	1.12681	0.938448	0.887384	0.863706	0.847494	0.832947	0.815863	0.795628	0.739019
		5	6.07245	5.68647	5.25702	4.22089	3.84269	3.59074	3.3745	3.16228	2.93537	2.70258	2.5267
		10	12.1449	10.5819	9.72138	7.53664	6.59216	5.93779	5.39492	4.88534	4.38484	3.92121	3.67217
		20	24.2898	18.6118	16.8877	12.4533	10.323	8.88896	7.76722	6.79041	5.92153	5.18479	4.86307

## Sheet: Panel 8D
Figure 8D		Dendritic sublinearity
		Nb of quanta	immature SC	Adult SC
		0.1	0	0
		1	0.0271376	0.047949
		5	0.109951	0.188544
		10	0.179205	0.301654
		20	0.256987	0.427362
